# Supplementary material
Source: publisher figshare collection journal article supplement (https://gsapubs.figshare.com/ndownloader/files/26207498)
Supplement: Supplementary file 1 [file 26207498]

## Sheet: 004-zrc
DA18-004		U-Pb ratios										U-Pb dates
Analysis	Core/Rim	238U/206Pb	±2SE (%)	207Pb/206Pb	±2SE (%)	207Pb/235Ua	±2SE (%)	206Pb/238U	±2SE (%)	rhob		207Pb/206Pb	±2SE	±2SE (sys)	207Pb/235U	±2SE	±2SE (sys)	206Pb/238Ud	±2SE	±2SE (sys)	Concordance		U (ppm)	U/Th
004-02		14.92	2.3	0.0507	5.3	0.468	5.7	0.067	2.3	0.39		230	122.4	122.486	390	18.72	20.28	418.1	9.32	12.5214	107.205		487	1.24
004-04		14.52	2.2	0.0554	4.5	0.526	5	0.0689	2.2	0.45		430	100.4	100.768	429	17.52	19.5081	429.5	9.14	12.543	100.117		915	2.47
004-05		14.91	2.2	0.0908	4.9	0.839	5.4	0.0671	2.2	0.4		1440	93.4	97.7394	619	24.8	27.7183	418.4	8.92	12.2307	67.5929		2464	2.43
004-07		15.27	2.3	0.0534	6.4	0.482	6.8	0.0655	2.3	0.34		350	144.8	144.969	399	22.4	23.779	408.8	9.12	12.2483	102.456		362	2.46
004-08		14.96	2.4	0.0583	5.8	0.537	6.3	0.0668	2.4	0.38		540	126.8	127.259	437	22.2	23.8585	417	9.7	12.7924	95.4233		382	1.04
004-09		14.98	2.3	0.0565	6	0.52	6.5	0.0668	2.3	0.36		470	132.8	133.132	425	22.4	23.9585	416.7	9.28	12.4729	98.0471		401	0.92
004-11		15.57	2.2	0.0537	4.9	0.475	5.4	0.0642	2.2	0.42		360	110.6	110.834	395	17.58	19.2735	401.2	8.56	11.7328	101.57		735	1.81
004-12		15.38	2.3	0.0549	5.9	0.492	6.4	0.065	2.3	0.37		410	132	132.254	406	21.2	22.7019	406	9.06	12.1663	100		343	1.31
004-14		15.06	2.2	0.0615	4.9	0.563	5.4	0.0664	2.2	0.41		660	105.2	106.025	454	19.64	21.6374	414.4	8.84	12.1176	91.2775		645	1.07
004-15		3.74	3.2	0.1734	3.4	6.39	4.7	0.2676	3.2	0.68		2590	56.8	76.8731	2030	41	57.7006	1528	43.6	53.2435	75.2709		724	1.84
004-16		15.46	2.4	0.0613	5.7	0.547	6.2	0.0647	2.4	0.38		650	122.4	123.088	443	22.2	23.9027	404.1	9.4	12.3967	91.219		318	1.03
004-17		14.34	2.6	0.0565	5.5	0.543	6.1	0.0697	2.6	0.43		470	121.8	122.162	440	21.8	23.5091	434	10.92	13.9495	98.6364		382	1.23
004-18		16.04	2.2	0.1181	5.9	1.015	6.3	0.0624	2.2	0.35		1930	105.8	112.621	711	32.2	35.2001	390	8.32	11.4045	54.8523		2258	1.64
004-21		14.79	2.3	0.0545	4.9	0.507	5.4	0.0676	2.3	0.43		390	110	110.276	417	18.52	20.3112	422	9.38	12.6182	101.199		468	0.93
004-22		15.06	2.3	0.0535	5.7	0.49	6.2	0.0664	2.3	0.37		350	128.8	128.99	405	20.6	22.1353	414.6	9.24	12.4151	102.37		415	1.72
004-25		15.03	2.3	0.0524	5.7	0.481	6.2	0.0665	2.3	0.37		300	130	130.138	399	20.2	21.7191	415.1	9.24	12.4218	104.035		366	0.82
004-28		14.84	2.6	0.0654	6.3	0.607	6.8	0.0674	2.6	0.38		790	132.2	133.141	482	26.2	27.9172	420	10.58	13.5091	87.1369		204	1.41
004-30		14.93	2.3	0.058	5.1	0.536	5.6	0.067	2.3	0.4		530	111.8	112.301	436	19.8	21.6351	418	9.3	12.5052	95.8716		381	0.88
004-32		15.23	2.4	0.0593	4.4	0.536	5	0.0657	2.4	0.47		580	95.6	96.3012	436	17.78	19.8032	410	9.54	12.5798	94.0367		885	1.02
004-33-1	core	14.66	2.4	0.0611	4.9	0.575	5.4	0.0682	2.4	0.44		640	105.4	106.174	461	20.2	22.2047	425	9.88	13.0332	92.1909		481	1.03
004-33-2	rim	15	2.4	0.0528	5.8	0.485	6.3	0.0666	2.4	0.38		320	131.8	131.955	402	20.8	22.2998	416	9.66	12.749	103.483		294	1.5
004-35		15.39	2.2	0.0638	4.7	0.572	5.2	0.065	2.2	0.42		740	99.6	100.694	459	19.16	21.2457	405.9	8.66	11.87	88.4314		1889	1.8
004-36		16.79	3.3	0.0698	7.8	0.573	8.4	0.0596	3.3	0.39		920	160.4	161.452	460	31.4	32.72	373	11.96	14.0959	81.087		436	1.48
004-37		15.08	2.5	0.063	6.7	0.576	7.1	0.0663	2.5	0.35		710	142.6	143.305	462	26.6	28.1591	414	10.02	12.9984	89.6104		209	1.2
004-38		15.04	2.2	0.054	4.7	0.495	5.2	0.0665	2.2	0.43		370	105.8	106.058	408	17.44	19.2546	415	8.84	12.1258	101.716		677	0.78
004-39		14.84	2.6	0.0497	5.5	0.462	6.1	0.0674	2.6	0.42		180	128.2	128.251	385	19.5	20.9652	421	10.58	13.5216	109.351		471	0.81
004-42		14.77	2.2	0.0618	4.6	0.576	5.1	0.0677	2.2	0.44		670	98.6	99.5064	462	18.94	21.0737	422.3	9	12.3424	91.4069		536	1.11
004-43		16.32	2.3	0.0589	5.3	0.497	5.8	0.0613	2.3	0.4		560	115.4	115.942	410	19.48	21.1355	383.3	8.56	11.4909	93.4878		457	1.06
004-45-1	core	14.56	2.4	0.0524	5.1	0.496	5.6	0.0687	2.4	0.42		300	116.2	116.355	409	18.98	20.6677	428	9.94	13.1178	104.645		687	0.91
004-45-2	rim	15.34	2.3	0.0559	4.9	0.503	5.4	0.0652	2.3	0.42		450	108.8	109.172	413	18.38	20.1507	407.1	9.08	12.1958	98.5714		635	1.11
004-46		13.99	2.6	0.0944	7.7	0.93	8.1	0.0715	2.6	0.32		1520	145.2	148.348	668	39.8	41.9825	445	11.18	14.2899	66.6168		646	0.9
004-56-1	core	15.09	2.3	0.0695	5.5	0.635	6	0.0663	2.3	0.38		910	113.2	114.654	499	23.6	25.6234	413.7	9.22	12.3882	82.9058		641	0.83
004-56-2	rim	15.64	2.3	0.0612	5.4	0.539	5.9	0.0639	2.3	0.39		640	116	116.704	438	20.8	22.5694	399.6	8.92	11.9766	91.2329		445	1.29
004-57		15.72	2.2	0.062	4.7	0.544	5.2	0.0636	2.2	0.43		670	100.6	101.489	441	18.56	20.5491	397.5	8.48	11.6238	90.1361		671	1.7
004-58		15.34	2.3	0.0527	5.9	0.473	6.3	0.0652	2.3	0.36		310	134.2	134.343	393	20.6	22.0486	407.1	9.08	12.1958	103.588		407	1.07
004-62		15.42	2.4	0.0518	5.4	0.463	5.9	0.0648	2.4	0.4		270	123.6	123.718	386	18.98	20.49	405	9.42	12.4236	104.922		535	1.23
004-63		15	2.4	0.0582	4.6	0.535	5.2	0.0667	2.4	0.46		540	100.6	101.178	435	18.36	20.317	416	9.66	12.749	95.6322		774	0.91
004-75		14.59	2.4	0.0549	5.6	0.518	6.1	0.0686	2.4	0.39		410	125.4	125.668	424	21.2	22.8331	427	9.92	13.0896	100.708		535	1.1
a207Pb/235U calculated assuming a natural 238U/235U ratio of 137.818
bRho value is calculated following the method of Paton et al. (2010)
dAge calculations are based on the decay constants of Jaffey et al. (1971)

## Sheet: 008-zrc
DA18-008		U-Pb ratios										U-Pb dates
Analysis	Core/Rim	238U/206Pb	±2SE (%)	207Pb/206Pb	±2SE (%)	207Pb/235Ua	±2SE (%)	206Pb/238U	±2SE (%)	rhob		207Pb/206Pb	±2SE	±2SE (sys)	207Pb/235U	±2SE	±2SE (sys)	206Pb/238Ud	±2SE	±2SE (sys)	Concordance		U (ppm)	U/Th
008-01		15.79	2.8	0.0598	2.3	0.522	3.7	0.0633	2.8	0.77		600	49.8	51.2254	427	12.62	15.238	396	10.76	13.3605	92.74		1802	3.82
008-02		18.38	2.7	0.0748	2.1	0.561	3.4	0.0544	2.7	0.79		1062	42.2	47.2438	452	12.48	15.4101	341.4	8.98	11.281	75.531		1371	4.47
008-03		15.23	2.7	0.0621	3.5	0.562	4.4	0.0657	2.7	0.61		680	74.8	76.0263	453	16.14	18.509	410	10.72	13.4966	90.5077		536	1.79
008-05		13.86	2.6	0.0583	1.7	0.58	3.1	0.0721	2.6	0.84		540	37.2	38.736	464	11.58	14.8396	449	11.28	14.418	96.7672		1997	3.95
008-06		18.5	3.8	0.0742	3.6	0.553	5.2	0.054	3.8	0.72		1050	72.6	75.5762	447	18.92	20.9258	339	12.56	14.2731	75.8389		536	4.21
008-10		14.23	2.7	0.0574	3.6	0.556	4.5	0.0703	2.7	0.59		500	79.2	79.8288	449	16.32	18.6275	438	11.42	14.3928	97.5501		322	2.34
008-11		15	2.7	0.0596	2.7	0.548	3.8	0.0667	2.7	0.72		590	58.6	59.7762	444	13.72	16.343	416	10.88	13.6966	93.6937		723	2.99
008-13		15.33	2.9	0.058	5.2	0.522	5.9	0.0652	2.9	0.48		530	114	114.492	426	20.8	22.4773	407	11.44	14.0404	95.5399		183	1.7
008-14		15	2.7	0.0737	4.8	0.677	5.6	0.0667	2.7	0.49		1030	97	99.1633	525	22.6	24.9201	416	10.88	13.6966	79.2381		496	3.4
008-15		14.69	2.7	0.0574	3.7	0.539	4.6	0.0681	2.7	0.59		510	81.4	82.0366	438	16.28	18.4872	425	11.1	13.9807	97.032		347	2.25
008-16		18.08	3.9	0.1437	3.6	1.096	5.3	0.0553	3.9	0.73		2270	62	76.845	751	28.2	31.9506	347	13.18	14.8955	46.2051		1314	5.27
008-17		15.59	2.7	0.0573	3.3	0.506	4.2	0.0642	2.7	0.63		500	72.6	73.2855	416	14.56	16.7695	401	10.5	13.2125	96.3942		439	3
008-18		15.94	2.7	0.0614	1.7	0.531	3.2	0.0627	2.7	0.84		651	36.4	38.6585	432	11.24	14.177	392	10.28	12.9284	90.7407		1447	2.08
008-19		14.78	2.6	0.0575	1.8	0.536	3.2	0.0676	2.6	0.83		510	39.6	40.8925	436	11.2	14.1943	422	10.62	13.5653	96.789		1525	27.37
008-22		16	2.8	0.0799	3	0.688	4.1	0.0625	2.8	0.68		1190	59.2	63.805	532	16.98	20.0382	391	10.62	13.1885	73.4962		571	2.26
008-24		20.91	4.7	0.0804	3	0.53	5.5	0.0478	4.7	0.85		1210	59	63.7702	432	19.62	21.4381	301	13.82	15.0742	69.6759		1219	4.05
008-27		15.84	2.7	0.0577	2.8	0.502	3.9	0.0631	2.7	0.69		520	61.4	62.2746	413	13.2	15.5714	395	10.34	13.0125	95.6416		537	2.5
008-28-1	Core	14.24	2.7	0.0548	3.5	0.53	4.5	0.0702	2.7	0.61		400	78.4	78.8071	432	15.56	17.7978	437	11.42	14.3807	101.157		470	2.93
008-28-2	Rim	68.4	3.5	0.1	3	0.2015	4.6	0.01461	3.5	0.75		1620	55.8	64.5244	186.4	7.84	8.68122	93.5	3.26	3.75826	50.1609		19493	0.64
008-29		14.92	2.7	0.055	2.9	0.508	3.9	0.067	2.7	0.67		410	64.8	65.3168	417	13.56	15.9195	418	10.94	13.7686	100.24		623	2.2
008-30		15.79	2.8	0.0703	4.3	0.613	5.1	0.0633	2.8	0.54		940	88.2	90.1814	486	19.82	22.0751	396	10.76	13.3605	81.4815		504	2.44
008-34		17.43	3.2	0.0836	3.6	0.661	4.8	0.0574	3.2	0.66		1280	70.2	74.7222	515	19.46	22.0178	360	11.2	13.3147	69.9029		782	1.8
008-35		15.87	3.3	0.0664	2	0.577	3.9	0.063	3.3	0.86		819	41.8	44.8948	462	14.32	17.0423	394	12.62	14.8781	85.2814		1505	2.59
008-40-1	Core	24.5	4.1	0.1299	3.3	0.73	5.3	0.0408	4.1	0.77		2100	58	71.6101	557	22.6	25.1964	258	10.36	11.5739	46.3196		6423	1.69
008-40-2	Rim	50	2.8	0.06143	1	0.1693	2.9	0.01999	2.8	0.94		653	21.4	25.0704	158.8	4.36	5.39412	127.6	3.54	4.36398	80.3526		43529	16.35
008-41		14.18	2.6	0.0556	2.3	0.54	3.5	0.0705	2.6	0.76		440	51.2	51.9507	439	12.36	15.1611	439	11.04	14.1057	100		1133	2.8
008-42		14.98	2.7	0.0589	2.2	0.542	3.5	0.0668	2.7	0.77		562	48	49.2985	440	12.42	15.2216	417	10.9	13.7246	94.7727		1136	2.13
008-44		18.61	2.7	0.0843	2.5	0.624	3.6	0.0537	2.7	0.74		1299	48.6	55.1083	492	14.36	17.4079	337.4	8.88	11.153	68.5772		1130	1.8
008-47		15.05	2.8	0.0668	3.6	0.612	4.6	0.0664	2.8	0.6		830	75	76.8151	485	17.58	20.0785	415	11.24	13.9724	85.567		934	2.72
008-48		15.8	2.7	0.0599	3	0.523	4.1	0.0633	2.7	0.67		600	65	66.0984	427	14.06	16.4504	396	10.36	13.0406	92.74		956	3.74
008-49		15	2.7	0.0557	3.4	0.512	4.4	0.0667	2.7	0.62		440	75.6	76.1104	419	14.92	17.1123	416	10.88	13.6966	99.284		560	2.32
008-50		15.2	2.7	0.059	2.9	0.535	4	0.0658	2.7	0.68		570	63.2	64.2199	435	14.02	16.5	411	10.74	13.5246	94.4828		657	1.97
008-51		17.44	2.8	0.0794	1.8	0.627	3.3	0.0573	2.8	0.84		1181	35.6	42.7231	494	13.04	16.3602	359	9.78	12.1326	72.6721		2145	2.58
a207Pb/235U calculated assuming a natural 238U/235U ratio of 137.818
bRho value is calculated following the method of Paton et al. (2010)
dAge calculations are based on the decay constants of Jaffey et al. (1971)

## Sheet: 011-zrc
DA18-011		U-Pb ratios										U-Pb dates
Analysis	Core/Rim	238U/206Pb	±2SE (%)	207Pb/206Pb	±2SE (%)	207Pb/235Ua	±2SE (%)	206Pb/238U	±2SE (%)	rhob		207Pb/206Pb	±2SE	±2SE (sys)	207Pb/235U	±2SE	±2SE (sys)	206Pb/238Ud	±2SE	±2SE (sys)	Concordance		U (ppm)	U/Th
011-02		16.97	3.4	0.2006	4.8	1.629	5.9	0.0589	3.4	0.58		2830	78.4	96.696	981	37	41.8801	369	12.2	14.2585	37.6147		1871	1.41
011-03		14.96	2.3	0.0598	3.9	0.551	4.5	0.0669	2.3	0.5		600	84.6	85.4468	446	16.34	18.6162	417.2	9.28	12.4796	93.5426		438	0.79
011-04		11.66	3.2	0.135	8.2	1.6	8.8	0.0858	3.2	0.36		2160	143	149.383	970	55	58.3212	530	16.3	19.4435	54.6392		2936	1.11
011-06		15.44	2.2	0.0657	1.8	0.586	2.8	0.0648	2.2	0.77		796	37.8	41.0157	469	10.66	14.1993	404.4	8.62	11.8203	86.226		2525	3
011-09		13.96	2.6	0.1322	4.6	1.306	5.2	0.0716	2.6	0.49		2130	80.6	91.1653	848	30.4	34.8109	446	11.2	14.318	52.5943		550	1.04
011-11		16.11	2.4	0.0611	2.9	0.523	3.8	0.0621	2.4	0.64		640	62.4	63.6993	427	13.12	15.6546	388.3	9.04	11.9177	90.9368		3264	1.46
011-12		14.76	2.2	0.06	2.8	0.56	3.5	0.0677	2.2	0.62		600	60.6	61.7767	452	12.98	15.8178	422.5	9	12.3451	93.4735		1147	1.21
011-14		15.08	2.2	0.0548	2.7	0.501	3.5	0.0663	2.2	0.63		400	60.4	60.9275	412	11.8	14.3923	413.9	8.82	12.0962	100.461		1354	2.05
011-15		13.33	2.2	0.0552	3	0.571	3.8	0.0751	2.2	0.59		420	67	67.5245	458	13.72	16.4968	466	9.9	13.5968	101.747		835	1.72
011-16		14.84	2.2	0.0542	2.3	0.504	3.2	0.0674	2.2	0.68		380	51.8	52.3546	414	10.82	13.6246	420.5	8.96	12.2886	101.57		3106	2.32
011-17		14.93	2.2	0.0724	7	0.669	7.4	0.067	2.2	0.3		1000	142.2	143.6	520	29.8	31.5626	417.8	8.9	12.2079	80.3462		1181	1.59
011-20		15.13	2.2	0.0552	3.4	0.503	4.1	0.0661	2.2	0.54		420	76	76.4628	414	13.76	16.0591	412.5	8.8	12.0624	99.6377		649	2.02
011-21-1	Core	14.85	3.1	0.161	8	1.5	8.6	0.0673	3.1	0.35		2470	135.2	143.942	930	52.2	55.4148	420	12.6	15.1433	45.1613		493	1.24
011-21-2	Rim	14.78	2.4	0.0873	3.2	0.814	4	0.0677	2.4	0.6		1370	61.6	67.419	605	18.22	21.8719	422	9.8	12.9334	69.7521		1164	1.49
011-22		15.33	2.2	0.0553	3.1	0.497	3.8	0.0652	2.2	0.59		420	69.2	69.708	410	12.82	15.2182	407.4	8.68	11.9051	99.3659		764	2.05
011-23		15.73	2.5	0.0537	4.6	0.47	5.2	0.0636	2.5	0.48		360	103.8	104.049	391	17	18.7124	397	9.64	12.4889	101.535		1150	2.66
011-24		15.27	2.3	0.0554	2.6	0.5	3.4	0.0655	2.3	0.65		430	58	58.6341	412	11.74	14.3431	409	9.12	12.251	99.2718		900	1.75
011-27		15.41	2.2	0.0561	3.1	0.502	3.8	0.0649	2.2	0.58		450	68.8	69.3862	413	12.9	15.3179	405.3	8.64	11.8472	98.1356		851	1.68
011-28		16.42	3.5	0.061	1.9	0.512	4	0.0609	3.5	0.88		638	40.8	42.7488	420	13.7	16.0702	381	12.96	15.0342	90.7143		5554	3.85
011-29		16.16	2.3	0.0974	2.9	0.83	3.7	0.0619	2.3	0.61		1570	54.2	62.6386	614	17.06	21.02	387.1	8.64	11.6012	63.0456		2188	1.57
011-31-1	Core	15.1	2.3	0.0552	2.6	0.504	3.5	0.0662	2.3	0.66		420	58	58.6051	414	11.8	14.4152	413.3	9.2	12.368	99.8309		1607	0.99
011-31-2	Rim	15.17	2.3	0.0561	3	0.51	3.8	0.0659	2.3	0.6		460	66.6	67.2324	418	12.96	15.4224	411.6	9.16	12.3155	98.4689		734	2.12
011-35		14.94	2.2	0.0546	3.4	0.504	4.1	0.0669	2.2	0.55		390	76.2	76.5982	414	13.78	16.0763	417.6	8.9	12.2052	100.87		569	2.07
011-36		20.35	2.4	0.1815	3.2	1.229	4	0.0491	2.4	0.59		2670	53	75.2367	814	22.4	27.6911	309.2	7.24	9.52153	37.9853		368	1.05
011-38		14.18	2.2	0.0912	3	0.886	3.7	0.0705	2.2	0.6		1450	57.2	64.1314	644	17.74	21.9226	439	9.34	12.8189	68.1677		926	1.45
011-43		15.48	2.2	0.0577	2.9	0.513	3.6	0.0646	2.2	0.61		520	63.6	64.4447	421	12.54	15.1046	403.5	8.6	11.7934	95.8432		663	2.06
011-46		15.67	2.2	0.0553	3	0.486	3.8	0.0638	2.2	0.59		420	67	67.5245	402	12.36	14.7449	398.8	8.5	11.6562	99.204		599	1.63
011-47		14.8	2.3	0.0542	4.1	0.505	4.7	0.0676	2.3	0.5		380	92.2	92.5127	415	16.02	18.0425	422	9.38	12.6182	101.687		338	2.42
011-48		16.9	2.3	0.1231	2.7	1.004	3.5	0.0592	2.3	0.65		2001	48	62.4948	706	18.04	22.9089	370.6	8.28	11.1129	52.4929		986	1.38
011-53		16.41	2.3	0.0733	3.6	0.616	4.3	0.0609	2.3	0.54		1020	72.8	75.6042	487	16.52	19.1775	381.4	8.52	11.4358	78.3162		559	1.49
011-54		14.8	2.3	0.0723	2.7	0.673	3.6	0.0676	2.3	0.65		990	54.8	58.2673	522	14.5	17.8674	421.6	9.38	12.6128	80.7663		2625	2.32
011-55		15.81	2.3	0.0904	3.7	0.788	4.3	0.0632	2.3	0.53		1430	70.6	76.173	590	19.5	22.7923	395.4	8.82	11.846	67.0169		498	1.54
011-58-1	Core	15.68	2.3	0.0568	3.7	0.499	4.3	0.0638	2.3	0.53		480	81.8	82.3614	411	14.74	16.8771	398.5	8.88	11.9321	96.9586		643	0.93
011-58-2	Rim	14.67	2.4	0.0548	2.6	0.515	3.6	0.0682	2.4	0.68		400	58.2	58.7473	422	12.22	14.8513	425	9.88	13.0332	100.711		3668	2.32
011-59		14.27	2.3	0.0553	2.3	0.534	3.3	0.0701	2.3	0.71		420	51.4	52.0819	435	11.5	14.4201	437	9.7	13.0567	100.46		2177	2.33
011-63		15.02	2.6	0.061	4.7	0.56	5.3	0.0666	2.6	0.49		640	101.2	102.006	451	19.58	21.5578	416	10.46	13.3654	92.2395		1204	2.09
011-64		25.34	2.8	0.05868	1.4	0.319	3.2	0.0395	2.8	0.89		554	30.6	32.5442	281	7.7	9.53281	249.5	6.86	8.48291	88.79		21642	7.31
011-65		15.12	5.7	0.0633	2.2	0.577	6.1	0.0662	5.7	0.93		717	46.8	48.9477	463	22.6	24.4235	413	22.8	24.2501	89.2009		10555	6.71
011-70		13.88	2.3	0.1281	3.7	1.272	4.3	0.0721	2.3	0.53		2070	65.2	77.2334	833	24.8	29.8763	449	9.96	13.4105	53.9016		620	0.72
011-72-1	Core	15.13	2.2	0.07	3.6	0.637	4.2	0.0661	2.2	0.53		930	74	76.3018	501	16.68	19.4582	412.6	8.8	12.0638	82.3553		1748	1.93
011-72-2	Rim	15.25	2.2	0.1161	3.4	1.049	4.1	0.0656	2.2	0.54		1900	61.2	72.0378	728	21	25.5537	409.4	8.72	11.9617	56.2363		787	1.74
011-73		14.57	2.3	0.062	2.9	0.587	3.7	0.0686	2.3	0.63		670	62	63.4315	469	13.9	16.7689	428	9.52	12.8025	91.258		1563	1.54
a207Pb/235U calculated assuming a natural 238U/235U ratio of 137.818
bRho value is calculated following the method of Paton et al. (2010)
dAge calculations are based on the decay constants of Jaffey et al. (1971)

## Sheet: 014-zrc
DA18-014		U-Pb ratios										U-Pb dates
Analysis	Core/Rim	238U/206Pb	±2SE (%)	207Pb/206Pb	±2SE (%)	207Pb/235Ua	±2SE (%)	206Pb/238U	±2SE (%)	rhob		207Pb/206Pb	±2SE	±2SE (sys)	207Pb/235U	±2SE	±2SE (sys)	206Pb/238Ud	±2SE	±2SE (sys)	Concordance		U (ppm)	U/Th
014-01		15.17	2.4	0.0606	6.4	0.55	6.8	0.0659	2.4	0.35		620	138	138.556	445	24.6	26.1605	412	9.56	12.6211	92.5843		278	1.05
014-02		15.36	2.3	0.0537	6.8	0.482	7.2	0.0651	2.3	0.32		360	153.6	153.769	399	23.8	25.1022	406.7	9.06	12.1756	101.93		266	1.54
014-03		14.97	2.3	0.0573	4.4	0.527	5	0.0668	2.3	0.47		500	96.8	97.3152	430	17.4	19.4093	417	9.28	12.4769	96.9767		798	0.93
014-04		14.61	2.5	0.0633	5.6	0.597	6.1	0.0684	2.5	0.41		720	119	119.868	475	23.2	25.0697	427	10.32	13.3953	89.8947		297	1.67
014-05		14.19	2.5	0.0757	5.7	0.735	6.2	0.0705	2.5	0.4		1090	114.2	116.262	559	26.8	29.0385	439	10.6	13.764	78.5331		364	1.14
014-08-1	Core	14.38	2.3	0.0583	4.8	0.559	5.4	0.0695	2.3	0.44		540	105	105.554	451	19.38	21.3763	433	9.64	12.9586	96.0089		460	1.37
014-08-2	Rim	14.68	2.4	0.0579	6.1	0.543	6.6	0.0681	2.4	0.37		520	133.8	134.204	441	23.4	25.007	425	9.86	13.018	96.3719		218	1.68
014-12		15.56	2.2	0.0561	4.9	0.497	5.3	0.0643	2.2	0.41		460	108.8	109.188	410	18.1	19.8708	401.5	8.56	11.7369	97.9268		515	1.01
014-13		15.56	2.4	0.0501	8.1	0.444	8.5	0.0643	2.4	0.29		200	188.2	188.243	373	26.4	27.4338	401	9.34	12.3108	107.507		161	1.58
014-15		15.09	2.4	0.0556	5.6	0.508	6.1	0.0663	2.4	0.39		440	124.8	125.11	417	20.8	22.4097	414	9.62	12.6926	99.2806		281	1.01
014-16		14.75	2.4	0.0605	6.1	0.566	6.6	0.0678	2.4	0.37		620	131.6	132.183	455	24	25.6673	423	9.82	12.9616	92.967		193	1.2
014-17		14.25	2.5	0.0716	7.3	0.693	7.7	0.0702	2.5	0.32		970	148.8	150.059	534	32	33.7352	437	10.56	13.7077	81.8352		387	1.22
014-18		14.79	2.5	0.0623	6	0.58	6.5	0.0676	2.5	0.39		680	128.2	128.919	465	24.2	25.9255	422	10.2	13.2391	90.7527		202	1.26
014-20		14.89	2.5	0.0615	6.1	0.569	6.5	0.0672	2.5	0.38		660	130.8	131.464	458	24.2	25.8756	419	10.14	13.1546	91.4847		227	1.51
014-23		15	2.4	0.0562	6.3	0.517	6.7	0.0666	2.4	0.36		460	139.8	140.102	423	23.4	24.8824	416	9.66	12.749	98.3452		281	1.38
014-24		14.63	2.3	0.0583	4.6	0.549	5.1	0.0684	2.3	0.45		540	100.6	101.178	444	18.52	20.5389	426	9.48	12.746	95.9459		874	0.92
014-25-1	Core	14.68	2.3	0.0618	5.5	0.58	5.9	0.0681	2.3	0.39		660	117.8	118.537	464	22.2	24.0616	425	9.46	12.7178	91.5948		452	0.91
014-25-2	Rim	15.16	2.3	0.0571	5.4	0.519	5.9	0.0659	2.3	0.39		500	119	119.419	425	20.4	22.1	411.7	9.18	12.3317	96.8706		577	1.07
014-28		15.15	2.4	0.0488	7	0.444	7.4	0.066	2.4	0.32		140	164.4	164.424	373	23.2	24.3699	412	9.58	12.6362	110.456		412	1.1
014-30		15.06	2.3	0.0583	4.9	0.533	5.5	0.0664	2.3	0.43		540	107.2	107.743	434	19.12	20.998	414	9.24	12.4071	95.3917		503	1.36
014-31		15.14	2.5	0.0517	8.1	0.47	8.5	0.0661	2.5	0.29		270	185.6	185.679	391	27.6	28.6864	412	9.98	12.9421	105.371		228	1.53
014-32		14.69	2.4	0.0527	6.7	0.494	7.1	0.0681	2.4	0.33		310	152.4	152.526	408	24	25.3493	424	9.86	13.005	103.922		272	1.26
014-33		14.81	2.4	0.0551	6.7	0.513	7.1	0.0675	2.4	0.34		410	149.8	150.024	420	24.4	25.8054	421	9.78	12.9052	100.238		269	1.35
014-35		15.24	2.5	0.0615	6.8	0.556	7.3	0.0656	2.5	0.34		660	145.8	146.396	449	26.2	27.6962	410	9.92	12.8704	91.314		220	1.61
014-36		15.04	2.3	0.0524	5.8	0.48	6.2	0.0665	2.3	0.37		300	132.2	132.336	398	20.6	22.0844	414.8	9.24	12.4178	104.221		387	0.97
014-37		14.86	2.4	0.058	5.4	0.538	5.9	0.0673	2.4	0.4		530	118.4	118.874	437	21	22.7462	420	9.76	12.877	96.1098		339	1.03
014-38		15.18	2.3	0.0642	5.1	0.583	5.6	0.0659	2.3	0.42		750	107.8	108.839	466	21	22.9753	411.2	9.16	12.3101	88.2403		348	1.2
014-39		13.82	2.8	0.0595	5.8	0.594	6.4	0.0724	2.8	0.44		590	126	126.551	473	24.4	26.1697	450	12.18	15.1444	95.1374		353	1.32
014-40		15.18	2.5	0.0536	6.6	0.487	7.1	0.0659	2.5	0.35		350	149.2	149.364	403	23.4	24.7492	411	9.96	12.9139	101.985		206	1.09
014-41		14.67	2.4	0.0598	5.8	0.562	6.3	0.0682	2.4	0.39		600	125.6	126.172	453	23	24.7201	425	9.88	13.0332	93.819		216	1.54
014-43		14.8	2.4	0.0497	6.8	0.463	7.3	0.0676	2.4	0.34		180	158.4	158.441	386	23.2	24.4507	421	9.8	12.9204	109.067		218	1.52
014-46		15.34	2.3	0.0678	5.3	0.61	5.7	0.0652	2.3	0.4		860	110	111.337	483	22.2	24.2107	407.2	9.08	12.1972	84.3064		321	1.52
014-47		15.24	2.2	0.0559	3.8	0.506	4.4	0.0656	2.2	0.5		450	84.4	84.8785	416	14.98	17.1354	409.6	8.74	11.979	98.4615		3798	2.11
a207Pb/235U calculated assuming a natural 238U/235U ratio of 137.818
bRho value is calculated following the method of Paton et al. (2010)
dAge calculations are based on the decay constants of Jaffey et al. (1971)

## Sheet: 015-zrc
DA18-015		U-Pb ratios										U-Pb dates
Analysis	Core/Rim	238U/206Pb	±2SE (%)	207Pb/206Pb	±2SE (%)	207Pb/235Ua	±2SE (%)	206Pb/238U	±2SE (%)	rhob		207Pb/206Pb	±2SE	±2SE (sys)	207Pb/235U	±2SE	±2SE (sys)	206Pb/238Ud	±2SE	±2SE (sys)	Concordance		U (ppm)	U/Th
015-01-1	Core	5.36	2.7	0.0769	2.8	1.978	3.9	0.1866	2.7	0.69		1120	55.8	60.1282	1108	26.2	34.3148	1103	27.4	35.1767	99.5487		178	1.87
015-01-2	Rim	14.65	2.9	0.0614	6.5	0.577	7.1	0.0683	2.9	0.41		650	139.6	140.204	463	26.4	27.9769	426	11.94	14.6681	92.0086		122	1.87
015-02		14.96	2.8	0.0527	4.8	0.485	5.6	0.0668	2.8	0.51		310	109.2	109.376	402	18.44	20.1165	417	11.3	14.0444	103.731		187	1.52
015-05		15.02	2.8	0.0558	5.5	0.512	6.2	0.0666	2.8	0.45		440	122.4	122.716	420	21.2	22.8035	416	11.26	14.0004	99.0476		226	1.12
015-06		15.2	2.8	0.0546	5.6	0.495	6.3	0.0658	2.8	0.45		400	125.6	125.855	409	21	22.5369	411	11.14	13.8444	100.489		161	1.67
015-07		14.9	2.7	0.0562	4	0.52	4.9	0.0671	2.7	0.56		460	88.8	89.2753	425	16.76	18.7922	419	10.94	13.7807	98.5882		310	1.74
015-08		14.53	2.8	0.0539	5.9	0.511	6.5	0.0688	2.8	0.43		360	133	133.195	419	22.4	23.9162	429	11.62	14.4444	102.387		160	2.13
015-09-1	Core	15.31	2.7	0.0689	3.3	0.62	4.3	0.0653	2.7	0.64		890	68.2	70.4846	490	16.58	19.2597	408	10.68	13.4405	83.2653		325	0.83
015-09-2	Rim	14.68	2.7	0.0564	4.4	0.529	5.2	0.0681	2.7	0.52		470	97.4	97.8525	431	18.14	20.0839	425	11.1	13.9807	98.6079		237	1.92
015-10		14.85	2.8	0.0568	4.5	0.527	5.3	0.0673	2.8	0.53		480	99.4	99.8625	430	18.58	20.4738	420	11.38	14.1444	97.6744		196	1.87
015-102		14.93	2.8	0.0536	4.8	0.495	5.5	0.067	2.8	0.5		360	108.4	108.639	408	18.68	20.3845	418	11.34	14.0885	102.451		238	1.02
015-103		15.09	2.7	0.0568	4.1	0.519	4.9	0.0663	2.7	0.56		480	90.6	91.1072	425	17.02	19.0245	414	10.82	13.6246	97.4118		265	1.59
015-11		14.67	2.8	0.057	4.6	0.536	5.4	0.0682	2.8	0.51		490	101.4	101.872	436	19.06	20.96	425	11.52	14.3164	97.4771		250	1.89
015-12		14.88	2.7	0.0578	4.3	0.535	5.1	0.0672	2.7	0.54		520	94.4	94.9712	435	17.98	19.9742	419	10.96	13.7966	96.3218		256	1.7
015-13		15.18	2.7	0.0567	3.9	0.515	4.8	0.0659	2.7	0.56		480	86.2	86.7329	422	16.36	18.4088	411	10.76	13.5405	97.3934		331	2.08
015-15		15.43	2.7	0.0563	4.7	0.503	5.5	0.0648	2.7	0.5		460	104.2	104.605	414	18.42	20.1954	405	10.6	13.3405	97.8261		242	1.56
015-16		15.3	2.8	0.0566	5.5	0.51	6.2	0.0653	2.8	0.45		470	121.6	121.963	418	21.2	22.7888	408	11.08	13.7605	97.6077		217	1.03
015-17		14.9	2.9	0.0574	6.3	0.531	6.9	0.0671	2.9	0.42		500	138.6	138.96	432	24.4	25.8845	419	11.76	14.4403	96.9907		127	1.63
015-19		14.55	2.9	0.0521	6	0.494	6.7	0.0687	2.9	0.43		290	137.2	137.323	407	22.4	23.8332	428	12.02	14.7565	105.16		138	1.5
015-20		14.96	2.8	0.0557	4.6	0.513	5.3	0.0669	2.8	0.52		440	102.4	102.777	420	18.54	20.3542	417	11.3	14.0444	99.2857		257	1.82
015-31		15.17	2.9	0.0571	5.9	0.519	6.5	0.0659	2.9	0.44		490	130	130.369	424	22.8	24.3259	411	11.56	14.1846	96.934		150	1.47
015-32		14.92	2.8	0.0545	4.1	0.503	5	0.067	2.8	0.57		390	92	92.3301	414	16.88	18.8014	418	11.34	14.0885	100.966		330	1.15
015-34		14.75	2.9	0.056	5.1	0.523	5.8	0.0678	2.9	0.49		450	113.2	113.557	427	20.4	22.1154	423	11.86	14.5682	99.0632		232	1.34
015-35		15.19	2.8	0.055	5.8	0.499	6.5	0.0659	2.8	0.43		410	129.8	130.059	411	21.8	23.2982	411	11.14	13.8444	100		168	1.78
015-38-1	Core	13.42	3.1	0.0553	4.7	0.568	5.7	0.0745	3.1	0.55		420	104.8	105.136	456	20.8	22.7115	463	13.86	16.6687	101.535		471	1.54
015-38-2	Rim	14.68	2.7	0.0546	3.7	0.513	4.6	0.0681	2.7	0.59		400	83	83.3847	420	15.76	17.8588	425	11.1	13.9807	101.19		346	2.08
015-41		14.94	2.7	0.0537	4	0.495	4.8	0.0669	2.7	0.56		360	90.2	90.4869	408	16.24	18.1748	418	10.92	13.7527	102.451		292	1.76
015-43		14.67	3	0.0524	6.8	0.492	7.4	0.0682	3	0.4		300	155	155.116	406	24.8	26.0955	425	12.34	14.9842	104.68		113	1.76
015-44		15.34	3	0.0545	7.2	0.489	7.8	0.0652	3	0.39		390	161.6	161.788	404	26	27.2266	407	11.84	14.3682	100.743		112	1.29
015-46-1	Core	15.16	2.9	0.056	7	0.509	7.5	0.066	2.9	0.38		450	155.4	155.66	418	26	27.311	412	11.56	14.1962	98.5646		108	2.41
015-46-2	Rim	15.98	2.7	0.0585	3.6	0.504	4.5	0.0626	2.7	0.6		550	78.6	79.366	415	15.32	17.4239	391	10.26	12.9004	94.2169		414	2.15
015-47		15.21	2.8	0.0555	4.9	0.503	5.6	0.0658	2.8	0.5		430	109.2	109.538	414	19.18	20.8909	410	11.14	13.8326	99.0338		231	1.68
015-48		14.63	2.7	0.055	3.2	0.518	4.2	0.0683	2.7	0.64		410	71.6	72.068	424	14.5	16.7976	426	11.14	14.0246	100.472		529	0.73
015-50		14.77	2.8	0.0538	5.2	0.502	5.9	0.0677	2.8	0.47		360	117.2	117.421	413	20	21.6386	422	11.44	14.2164	102.179		206	1.09
015-52		14.41	2.7	0.0552	4.7	0.528	5.5	0.0694	2.7	0.5		420	105	105.335	430	19.02	20.8739	433	11.3	14.2368	100.698		219	1.83
015-63		14.79	2.7	0.0551	4.7	0.513	5.4	0.0676	2.7	0.5		410	105	105.32	421	18.68	20.49	422	11.02	13.8807	100.238		226	1.23
015-64		13.81	3	0.1008	6.7	1.006	7.4	0.0724	3	0.41		1640	124.4	128.651	707	37.4	39.9837	451	13.06	15.8721	63.7907		152	1.06
015-72		15.81	2.9	0.0557	6.7	0.486	7.3	0.0632	2.9	0.4		440	149	149.26	402	24.2	25.5006	395	11.12	13.6405	98.2587		102	1.57
015-73-1	Core	15.71	2.9	0.0549	5.7	0.482	6.4	0.0636	2.9	0.46		410	127.6	127.863	399	21.2	22.6522	398	11.18	13.7242	99.7494		144	1.49
015-73-2	Rim	15.55	2.8	0.0551	3.8	0.488	4.7	0.0643	2.8	0.59		410	85	85.3946	404	15.72	17.675	402	10.9	13.5444	99.505		314	2.03
015-82-1	Core	15.5	2.7	0.0595	5.2	0.529	5.8	0.0645	2.7	0.47		590	112.8	113.416	431	20.6	22.3308	403	10.54	13.2686	93.5035		202	1.07
015-82-2	Rim	15.08	2.7	0.0561	4.3	0.513	5.1	0.0663	2.7	0.53		460	95.4	95.8426	421	17.48	19.4022	414	10.82	13.6246	98.3373		280	2.01
015-86-1	Core	13.77	3.2	0.056	4.9	0.56	5.8	0.0726	3.2	0.55		450	108.8	109.172	452	21.4	23.231	452	13.96	16.6314	100		328	1.24
015-86-2	Rim	15.08	2.8	0.055	4.7	0.502	5.5	0.0663	2.8	0.51		410	105.2	105.519	413	18.58	20.3333	414	11.22	13.9444	100.242		206	1.8
015-89-1	Core	15.23	2.8	0.0544	4.1	0.492	4.9	0.0656	2.8	0.56		390	92	92.3301	406	16.64	18.5155	410	11.12	13.8165	100.985		312	1.21
015-89-2	Rim	14.86	2.8	0.0556	4.7	0.515	5.5	0.0673	2.8	0.52		440	104.6	104.97	422	18.9	20.6989	420	11.38	14.1444	99.5261		219	1.93
015-90-1	Core	14.92	2.9	0.0534	5.1	0.493	5.9	0.067	2.9	0.49		350	115.4	115.612	407	19.68	21.297	418	11.74	14.4124	102.703		213	1.28
015-90-2	Rim	14.62	2.7	0.0542	4.8	0.511	5.5	0.0684	2.7	0.49		380	108	108.267	419	18.9	20.6745	427	11.14	14.0368	101.909		238	1.92
015-94		15.27	2.7	0.0562	4.3	0.507	5.1	0.0655	2.7	0.53		460	95.4	95.8426	417	17.34	19.2414	409	10.7	13.4686	98.0815		307	1.24
015-95		14.52	2.7	0.0555	3.3	0.526	4.3	0.0689	2.7	0.63		430	73.6	74.1007	429	14.94	17.2285	429	11.22	14.1246	100		374	1.58
015-97		14.9	2.8	0.0576	4.7	0.533	5.5	0.0671	2.8	0.51		510	103.2	103.703	434	19.3	21.1621	419	11.36	14.1164	96.5438		198	1.71
a207Pb/235U calculated assuming a natural 238U/235U ratio of 137.818
bRho value is calculated following the method of Paton et al. (2010)
dAge calculations are based on the decay constants of Jaffey et al. (1971)

## Sheet: 018-zrc
DA18-018		U-Pb ratios										U-Pb dates
Analysis	Core/Rim	238U/206Pb	±2SE (%)	207Pb/206Pb	±2SE (%)	207Pb/235Ua	±2SE (%)	206Pb/238U	±2SE (%)	rhob		207Pb/206Pb	±2SE	±2SE (sys)	207Pb/235U	±2SE	±2SE (sys)	206Pb/238Ud	±2SE	±2SE (sys)	Concordance		U (ppm)	U/Th
018-01		15.4	2.6	0.0596	7.1	0.534	7.6	0.0649	2.6	0.34		590	154	154.451	434	26.8	28.1706	406	10.22	13.0531	93.5484		162	1.51
018-05		14.99	2.7	0.0596	7.4	0.548	7.8	0.0667	2.7	0.34		590	160.6	161.033	443	28.4	29.75	416	10.88	13.6966	93.9052		117	0.71
018-06		14.68	3	0.0592	9.6	0.556	10	0.0681	3	0.3		570	208	208.312	449	36.4	37.4913	425	12.34	14.9842	94.6548		74	1.17
018-07		15.55	2.5	0.0578	6.6	0.512	7.1	0.0643	2.5	0.35		520	144.8	145.173	420	24.2	25.6164	402	9.74	12.6297	95.7143		215	0.86
018-08		15.17	2.5	0.0608	6.8	0.552	7.2	0.0659	2.5	0.35		630	146.4	146.941	446	26.2	27.6768	412	9.96	12.9267	92.3767		171	0.68
018-09		15.15	2.6	0.0611	7.9	0.556	8.4	0.066	2.6	0.32		640	169.8	170.282	449	30.2	31.5068	412	10.38	13.253	91.7595		129	0.96
018-10		15.35	2.6	0.0573	7.6	0.514	8	0.0651	2.6	0.32		500	167.2	167.499	421	27.8	29.0471	407	10.26	13.0968	96.6746		139	1.03
018-11		15.09	2.6	0.0527	7	0.481	7.5	0.0663	2.6	0.35		310	159.2	159.321	399	24.6	25.8619	414	10.42	13.3092	103.759		148	0.7
018-13		15.11	2.7	0.0603	7.8	0.55	8.3	0.0662	2.7	0.33		610	168.4	168.841	445	29.8	31.1006	413	10.8	13.5966	92.809		118	1.36
018-14		14.75	2.5	0.0559	7.2	0.522	7.7	0.0678	2.5	0.33		450	160	160.253	426	26.6	27.9312	423	10.24	13.2827	99.2958		152	0.67
018-15		14.86	2.7	0.0561	9.3	0.521	9.7	0.0673	2.7	0.27		460	206	206.205	425	33.6	34.6585	420	10.98	13.8246	98.8235		101	1.1
018-16		15.04	2.6	0.0544	8.6	0.498	9	0.0665	2.6	0.29		390	193.2	193.357	411	30.4	31.4917	415	10.44	13.3373	100.973		109	1.09
018-19		15.04	2.4	0.0558	5.8	0.511	6.2	0.0665	2.4	0.38		440	129	129.3	419	21.6	23.1686	415	9.64	12.7208	99.0453		261	0.88
018-21		15.42	3	0.0618	11	0.552	12	0.0648	3	0.26		670	236	236.38	446	41.2	42.1546	405	11.78	14.2961	90.8072		74	0.95
018-23		15.57	2.3	0.0582	5.4	0.515	5.9	0.0642	2.3	0.4		530	118.2	118.674	422	20.2	21.8923	401.2	8.94	12.0128	95.0711		436	1.86
018-25		15.55	2.4	0.0572	6.5	0.507	6.9	0.0643	2.4	0.35		500	143.2	143.549	416	23.6	25.0236	402	9.34	12.3238	96.6346		200	0.65
018-26		14.97	2.7	0.0593	8.4	0.546	8.8	0.0668	2.7	0.31		580	182.6	182.968	442	31.6	32.8132	417	10.9	13.7246	94.3439		104	0.87
018-27		15.14	2.4	0.0553	6.8	0.504	7.2	0.066	2.4	0.34		420	151.8	152.032	414	24.6	25.9561	412	9.58	12.6362	99.5169		170	0.58
018-30		15.25	2.5	0.0581	6.3	0.525	6.8	0.0656	2.5	0.37		530	138	138.407	429	23.6	25.1113	410	9.92	12.8704	95.5711		154	0.7
018-31		14.12	3.1	0.0615	11	0.6	11	0.0708	3.1	0.27		660	236	236.369	477	43.6	44.6315	441	13.22	15.8922	92.4528		62	1.18
018-34		15.39	2.4	0.0564	5.6	0.505	6.1	0.065	2.4	0.39		470	124	124.356	415	20.8	22.3949	405.7	9.44	12.4479	97.759		224	0.68
018-35		14.94	2.4	0.0556	5.3	0.513	5.8	0.0669	2.4	0.42		440	118	118.328	421	20	21.7001	418	9.7	12.8055	99.2874		237	0.63
018-37		15.2	2.7	0.0632	9.7	0.573	10	0.0658	2.7	0.26		710	206	206.489	460	37.2	38.3208	411	10.74	13.5246	89.3478		92	0.72
018-45		15.41	2.6	0.0552	6.6	0.494	7.1	0.0649	2.6	0.36		420	147.4	147.639	408	23.8	25.16	405	10.22	13.0406	99.2647		164	0.68
018-47		15.28	2.4	0.0597	6.4	0.538	6.9	0.0654	2.4	0.36		590	138.8	139.301	437	24.2	25.7299	409	9.5	12.5364	93.5927		189	0.78
018-48		14.98	2.3	0.0553	4.3	0.508	4.9	0.0667	2.3	0.47		420	96	96.3668	417	16.7	18.6667	416	9.28	12.4636	99.7602		398	0.36
018-51		15.4	2.5	0.0626	6.5	0.56	7	0.0649	2.5	0.36		690	138.6	139.285	452	25.4	26.9607	405	9.82	12.7296	89.6018		151	1.12
018-52		15.24	2.7	0.0585	8.2	0.529	8.6	0.0656	2.7	0.31		550	179.2	179.537	431	30.4	31.5985	410	10.72	13.4966	95.1276		140	0.97
018-53		15.2	2.5	0.0515	6.6	0.466	7	0.0658	2.5	0.36		260	151.6	151.689	389	22.8	24.0908	411	9.94	12.8985	105.656		166	0.8
018-54		15.41	2.8	0.055	10	0.492	11	0.0649	2.8	0.26		410	224	224.15	406	34.8	35.7348	405	11	13.6605	99.7537		75	0.66
018-56		15.45	2.6	0.057	7.2	0.509	7.6	0.0647	2.6	0.34		490	158.8	159.102	418	26.2	27.5014	404	10.18	12.9969	96.6507		146	1.14
018-57		15.14	2.8	0.059	11	0.537	11	0.066	2.8	0.26		570	240	240.271	437	40.2	41.1391	412	11.18	13.8885	94.2792		76	0.96
018-59		16.03	2.6	0.0642	8.1	0.552	8.5	0.0624	2.6	0.3		750	171.2	171.856	446	30.8	32.0657	390	9.84	12.5565	87.4439		162	1
018-63		15.01	2.7	0.0582	7.1	0.534	7.6	0.0666	2.7	0.36		540	155.4	155.775	435	26.8	28.1768	416	10.88	13.6966	95.6322		129	0.88
018-67		14.57	3.1	0.059	12	0.558	12	0.0686	3.1	0.26		570	262	262.248	451	45	45.8951	428	12.84	15.4318	94.9002		62	1.17
018-81		14.86	3	0.061	11	0.566	11	0.0673	3	0.26		640	236	236.347	455	41.8	42.7791	420	12.2	14.8122	92.3077		67	1.19
018-82		15	4.2	0.071	17	0.66	17	0.0667	4.2	0.24		970	348	348.54	510	70.2	70.9372	416	16.92	18.8549	81.5686		86	0.91
018-83		15.14	2.6	0.0523	7.6	0.476	8	0.066	2.6	0.33		300	173.4	173.504	395	26.4	27.5567	412	10.38	13.253	104.304		135	0.68
018-84		15.64	2.5	0.0598	5.6	0.527	6.1	0.0639	2.5	0.41		600	121.4	121.992	430	21.4	23.0634	399	9.68	12.5452	92.7907		217	0.62
018-85		15.99	2.7	0.0559	9.3	0.482	9.7	0.0625	2.7	0.27		450	206	206.197	399	32	32.98	391	10.24	12.8845	97.995		117	0.69
018-86		14.71	3.7	0.0674	13	0.632	14	0.068	3.7	0.27		850	270	270.535	497	53.2	54.1206	424	15.18	17.388	85.3119		86	0.9
018-90		15.64	2.5	0.0554	7.4	0.488	7.8	0.064	2.5	0.32		430	165	165.224	404	26	27.2266	400	9.68	12.558	99.0099		167	0.72
018-91		15.47	3	0.0554	9.3	0.493	9.8	0.0646	3	0.3		430	208	208.178	407	32.8	33.795	404	11.74	14.2518	99.2629		105	0.78
018-92		15.14	2.5	0.0562	6.4	0.512	6.9	0.066	2.5	0.36		460	142	142.298	420	23.6	25.0503	412	9.98	12.9421	98.0952		178	2.35
018-93		14.86	2.3	0.0545	5.4	0.505	5.9	0.0673	2.3	0.4		390	121.2	121.451	415	20	21.6539	420	9.34	12.5617	101.205		280	0.53
018-94		15.03	2.7	0.0537	8.1	0.493	8.5	0.0665	2.7	0.32		360	182.8	182.942	407	28.6	29.7358	415	10.86	13.6686	101.966		109	0.91
018-95		15.13	2.3	0.0571	4.6	0.52	5.1	0.0661	2.3	0.45		490	101.4	101.872	425	17.86	19.7795	412.6	9.2	12.3586	97.0824		359	0.58
018-98		14.96	2.4	0.0579	6.6	0.534	7	0.0668	2.4	0.35		530	144.8	145.187	434	24.8	26.2751	417	9.7	12.7924	96.0829		200	0.62
018-99		15.31	2.5	0.0554	7	0.499	7.5	0.0653	2.5	0.34		430	156	156.237	411	25.2	26.5068	408	9.88	12.8141	99.2701		150	0.65
018-101		14.96	2.7	0.0526	9.6	0.484	9.9	0.0668	2.7	0.27		310	218	218.088	401	33	33.9606	417	10.9	13.7246	103.99		109	0.95
018-102		15.57	2.5	0.0543	5.7	0.481	6.2	0.0642	2.5	0.4		380	128.2	128.425	399	20.6	22.0916	401	9.72	12.6015	100.501		221	0.68
018-104		15.38	2.6	0.0988	6.4	0.885	6.9	0.065	2.6	0.38		1600	119.4	123.614	644	33	35.4245	406	10.24	13.0687	63.0435		139	0.68
018-106		14.31	2.6	0.0578	7.2	0.557	7.7	0.0699	2.6	0.34		520	158	158.342	450	27.8	29.2205	435	10.94	13.9776	96.6667		114	0.81
018-107		15.59	2.4	0.0555	5.7	0.491	6.2	0.0641	2.4	0.39		430	127	127.291	406	20.6	22.1426	400.7	9.32	12.2917	98.6946		220	0.79
018-111		15.38	2.8	0.0575	7.9	0.516	8.4	0.065	2.8	0.33		510	173.6	173.899	422	29	30.2032	406	11.02	13.6885	96.2085		104	1.24
018-113		15.36	2.5	0.0531	6.7	0.476	7.2	0.0651	2.5	0.34		330	152	152.143	396	23.4	24.704	407	9.86	12.7859	102.778		162	0.66
018-114		14.91	2.4	0.0544	5.7	0.503	6.2	0.0671	2.4	0.39		390	128	128.237	414	21	22.5734	419	9.72	12.8337	101.208		221	0.65
018-115		15.13	2.3	0.0581	5.2	0.529	5.7	0.0661	2.3	0.41		530	113.8	114.293	431	19.98	21.7602	412.7	9.2	12.36	95.7541		257	0.68
018-116		14.88	2.6	0.0563	8.4	0.521	8.8	0.0672	2.6	0.29		460	186.2	186.427	426	30.6	31.764	419	10.56	13.481	98.3568		122	1.48
018-117		15.36	2.5	0.0556	6	0.499	6.5	0.0651	2.5	0.38		440	133.6	133.89	411	22	23.4855	406	9.86	12.7732	98.7835		218	0.42
018-118		14.62	3.1	0.0539	11	0.508	12	0.0684	3.1	0.27		360	248	248.104	417	39	39.8818	426	12.8	15.3763	102.158		62	1
018-121		15.16	2.7	0.0526	8.6	0.478	9	0.0659	2.7	0.3		310	195.8	195.898	397	29.6	30.6464	412	10.78	13.5686	103.778		106	0.73
a207Pb/235U calculated assuming a natural 238U/235U ratio of 137.818
bRho value is calculated following the method of Paton et al. (2010)
dAge calculations are based on the decay constants of Jaffey et al. (1971)

## Sheet: 022-zrc
DA18-022		U-Pb ratios										U-Pb dates
Analysis	Core/Rim	238U/206Pb	±2SE (%)	207Pb/206Pb	±2SE (%)	207Pb/235Ua	±2SE (%)	206Pb/238U	±2SE (%)	rhob		207Pb/206Pb	±2SE	±2SE (sys)	207Pb/235U	±2SE	±2SE (sys)	206Pb/238Ud	±2SE	±2SE (sys)	Concordance		U (ppm)	U/Th
022-01		14.47	1.8	0.069	3.1	0.658	3.6	0.0691	1.8	0.5		900	64	66.4831	513	14.44	17.7139	430.9	7.5	11.4245	83.9961		1983	0.75
022-04		14.16	2.3	0.0593	3.9	0.577	4.5	0.0706	2.3	0.5		580	84.8	85.5897	463	16.82	19.2005	440	9.78	13.1563	95.0324		886	0.92
022-05		14.91	1.9	0.0609	4.8	0.563	5.1	0.0671	1.9	0.37		630	103.4	104.165	453	18.88	20.9413	418.5	7.7	11.3731	92.3841		542	1.49
022-07-1	Core	14.68	2	0.0648	7	0.608	7.3	0.0681	2	0.28		770	147.4	148.202	482	28	29.613	424.8	8.22	11.8216	88.1328		275	1.71
022-07-2	Rim	14.44	2	0.0638	6.5	0.609	6.8	0.0692	2	0.3		740	137.6	138.394	483	26.2	27.9241	431.6	8.36	12.0167	89.3582		395	0.98
022-08		14.91	1.7	0.0745	4.2	0.689	4.6	0.0671	1.7	0.38		1050	84.6	87.1674	532	18.76	21.5673	418.4	6.88	10.8332	78.6466		805	1.09
022-09		14.75	1.8	0.061	4.2	0.57	4.6	0.0678	1.8	0.4		640	90.4	91.3017	458	16.84	19.1701	422.8	7.36	11.2104	92.3144		761	1.03
022-10		15.33	1.8	0.0748	3.4	0.672	3.8	0.0652	1.8	0.48		1060	68.4	71.6101	522	15.7	18.8543	407.4	7.1	10.8074	78.046		639	1.09
022-11		14.64	2.4	0.0687	6	0.646	6.5	0.0683	2.4	0.37		890	124	125.271	506	25.8	27.7138	426	9.9	13.0614	84.1897		1419	0.9
022-110		14.77	1.8	0.0594	4.3	0.555	4.7	0.0677	1.8	0.38		580	93.4	94.1176	448	16.88	19.1106	422.3	7.36	11.2029	94.2634		623	1.95
022-112		14.57	1.7	0.0612	4	0.579	4.3	0.0686	1.7	0.4		640	86	86.9473	464	16.18	18.6524	427.9	7.04	11.0816	92.2198		512	1.91
022-114		14.62	1.7	0.0559	1.8	0.526	2.5	0.0684	1.7	0.67		446	40	40.9825	429	8.68	12.2049	426.4	7.02	11.0457	99.3939		1657	0.83
022-115		14.22	2	0.058	3.9	0.562	4.3	0.0703	2	0.46		530	85.4	86.0553	453	16.02	18.4045	438.2	8.48	12.195	96.7329		635	1.92
022-116		14.59	1.7	0.0559	1.8	0.528	2.5	0.0686	1.7	0.67		445	40	40.9782	430	8.68	12.2189	427.4	7.02	11.0611	99.3953		1909	0.76
022-118		14.51	1.8	0.0592	5	0.562	5.3	0.0689	1.8	0.34		570	108.8	109.396	453	19.42	21.4294	429.5	7.48	11.3903	94.8124		360	2.47
022-119		6.29	2	0.0705	3.9	1.544	4.4	0.159	2	0.45		940	80	82.1793	948	27	32.9921	951	17.68	25.9681	100.316		93	3.45
022-121		14.45	1.9	0.0606	4.7	0.578	5.1	0.0692	1.9	0.37		620	101.4	102.155	463	18.86	21.0106	431.4	7.92	11.7119	93.1749		409	1.5
022-122-1	Core	14.6	1.6	0.0554	1.9	0.523	2.5	0.0685	1.6	0.65		426	42.4	43.2475	427	8.66	12.1625	427.2	6.62	10.8085	100.047		1917	0.85
022-122-2	Rim	14.38	1.7	0.0582	1.6	0.558	2.3	0.0695	1.7	0.73		536	35	36.6049	450	8.48	12.3657	433.4	7.12	11.2173	96.3111		3681	0.79
022-123		14.47	1.9	0.0584	4.2	0.557	4.6	0.0691	1.9	0.4		550	91.8	92.4567	449	16.72	18.9789	430.9	7.92	11.7045	95.9688		473	1.84
022-13		14.74	2	0.0742	4.7	0.694	5.1	0.0678	2	0.39		1050	94.8	97.0981	535	21.2	23.7472	423.1	8.2	11.7833	79.0841		244	1.71
022-15		14.53	1.6	0.05619	1.4	0.533	2.2	0.0688	1.6	0.75		459	31	32.3307	434	7.5	11.4714	429.1	6.64	10.8508	98.871		2884	1.13
022-16		13.84	1.9	0.1498	2.3	1.491	3	0.0722	1.9	0.63		2343	39.4	61.2227	927	18.14	25.9382	449.6	8.26	12.21	48.5005		538	1.11
022-17-1	Core	17.15	2	0.1126	4.4	0.905	4.8	0.0583	2	0.41		1840	79.6	87.6949	654	23.4	26.8076	365.3	7.1	10.1876	55.8563		258	2.1
022-17-2	Rim	16.21	2.3	0.0647	2.6	0.55	3.5	0.0617	2.3	0.67		760	54.8	56.869	445	12.5	15.3447	385.8	8.62	11.569	86.6966		2765	0.5
022-18		15	1.7	0.0585	2.4	0.537	3	0.0666	1.7	0.56		550	52.4	53.5421	437	10.44	13.6155	415.9	6.84	10.7692	95.1716		1190	0.97
022-19		14.26	1.7	0.05549	1.7	0.536	2.3	0.0701	1.7	0.71		431	37.8	38.7704	436	8.52	12.1913	437	7.18	11.3111	100.229		3304	0.53
022-20		14.59	1.8	0.0605	2.5	0.572	3.1	0.0686	1.8	0.59		620	54	55.4054	459	11.38	14.6211	427.5	7.44	11.3338	93.1373		1203	0.9
022-21		14.28	1.8	0.05597	1.7	0.54	2.5	0.07	1.8	0.73		450	37.8	38.8567	438	8.82	12.431	436.3	7.6	11.5716	99.6119		2907	2.18
022-23		14.58	1.9	0.0639	4.4	0.604	4.8	0.0686	1.9	0.39		740	93.2	94.3678	480	18.32	20.6829	427.7	7.86	11.6168	89.1042		421	2.03
022-30		14.59	1.8	0.059	3.9	0.557	4.3	0.0686	1.8	0.43		560	85	85.7347	450	15.6	18.01	427.4	7.44	11.3323	94.9778		601	1.42
022-33-1	Core	15.27	1.7	0.0706	2.7	0.638	3.2	0.0655	1.7	0.54		950	55.2	58.3784	501	12.6	16.0985	408.9	6.74	10.5975	81.6168		2264	2.65
022-33-2	Rim	14.7	1.7	0.0628	1.7	0.589	2.4	0.068	1.7	0.7		700	36.2	38.8129	470	9.04	13.0415	424.3	6.98	10.9878	90.2766		3370	1.93
022-36		14.86	1.7	0.0616	3.2	0.571	3.6	0.0673	1.7	0.47		660	68.6	69.8584	459	13.38	16.2264	419.8	6.9	10.8675	91.4597		1592	0.89
022-37-1	Core	14.15	1.7	0.05708	1.4	0.556	2.2	0.0707	1.7	0.76		493	30.8	32.3398	449	8	12.0267	440.2	7.24	11.3986	98.0401		3109	2.4
022-37-2	Rim	15	2.1	0.1122	2.6	1.031	3.3	0.0666	2.1	0.63		1835	47.2	59.789	719	17.22	22.4346	415.9	8.46	11.8643	57.8442		581	1.88
022-38-1	Core	15.42	1.8	0.0658	5.2	0.588	5.5	0.0649	1.8	0.32		800	109	110.168	469	20.6	22.635	405.1	7.06	10.7464	86.3753		457	1.19
022-38-2	Rim	14.51	1.7	0.0575	2.2	0.546	2.8	0.0689	1.7	0.61		510	48.4	49.4631	442	9.98	13.3321	429.7	7.06	11.1221	97.2172		1574	0.74
022-40		14.87	2	0.0638	7.2	0.592	7.4	0.0673	2	0.27		740	152.4	153.117	472	28.2	29.7381	419.6	8.12	11.6773	88.8983		264	1.79
022-42		14.14	2.4	0.0752	4.8	0.733	5.3	0.0707	2.4	0.45		1070	96.4	98.7467	558	23	25.5645	440	10.22	13.4866	78.853		1559	0.7
022-43		14.49	1.9	0.0892	6.6	0.849	6.9	0.069	1.9	0.28		1410	126.4	129.508	624	32	34.3475	430.2	7.9	11.6807	68.9423		315	1.65
022-44		14.24	1.8	0.0562	3.1	0.544	3.6	0.0703	1.8	0.49		460	68.8	69.4124	441	12.82	15.561	437.6	7.62	11.6044	99.229		771	0.91
022-47		14.67	1.8	0.0573	3.4	0.539	3.8	0.0682	1.8	0.47		500	74.8	75.4655	438	13.66	16.2275	425.2	7.4	11.2729	97.0776		671	1.28
022-49		16.74	1.8	0.0721	3.1	0.594	3.6	0.0597	1.8	0.51		990	63	66.0382	473	13.56	16.5338	374	6.54	9.93589	79.0698		437	1.71
022-51		14.72	1.7	0.0606	2.3	0.568	2.9	0.0679	1.7	0.59		626	49.6	51.1557	457	10.52	13.9359	423.8	6.98	10.9801	92.7352		1310	1.99
022-67-1	Core	14.26	1.9	0.0575	3.7	0.556	4.1	0.0701	1.9	0.46		510	81.4	82.0366	449	15.08	17.5513	436.8	8.02	11.8591	97.2829		665	0.57
022-67-2	Rim	14.59	2.2	0.0664	7.7	0.627	8	0.0685	2.2	0.28		820	160.8	161.634	494	31.4	32.9177	427.3	9.1	12.4838	86.498		133	1.17
022-74-1	Core	14.29	3.1	0.0679	9.4	0.654	9.9	0.07	3.1	0.31		860	195	195.757	511	39.8	41.0912	436	13.06	15.7036	85.3229		769	1.2
022-74-2	Rim	14.67	2	0.061	6.5	0.573	6.8	0.0682	2	0.3		640	139.8	140.385	460	25.2	26.8269	425	8.22	11.8245	92.3913		234	1.69
022-77-1	Core	14.86	1.9	0.0605	5.9	0.561	6.2	0.0673	1.9	0.31		620	127.4	128.002	452	22.6	24.3409	419.8	7.72	11.4058	92.8761		293	1
022-77-2	Rim	15.04	1.7	0.0599	4.5	0.549	4.8	0.0665	1.7	0.36		600	97.4	98.1364	444	17.3	19.4459	414.8	6.84	10.7522	93.4234		477	1.65
022-83		13.99	1.8	0.0572	2.4	0.563	3	0.0715	1.8	0.61		500	52.8	53.7386	454	10.98	14.248	445.2	7.74	11.7978	98.0617		1063	2.07
a207Pb/235U calculated assuming a natural 238U/235U ratio of 137.818
bRho value is calculated following the method of Paton et al. (2010)
dAge calculations are based on the decay constants of Jaffey et al. (1971)

## Sheet: 023-zrc
DA18-023		U-Pb ratios										U-Pb dates
Analysis	Core/Rim	238U/206Pb	±2SE (%)	207Pb/206Pb	±2SE (%)	207Pb/235Ua	±2SE (%)	206Pb/238U	±2SE (%)	rhob		207Pb/206Pb	±2SE	±2SE (sys)	207Pb/235U	±2SE	±2SE (sys)	206Pb/238Ud	±2SE	±2SE (sys)	Concordance		U (ppm)	U/Th
023-01		14.71	2.3	0.0551	3.6	0.517	4.2	0.068	2.3	0.54		420	80.4	80.8376	423	14.76	17.0126	424.1	9.44	12.6909	100.26		692	1.04
023-02		14.81	2.3	0.0599	4	0.557	4.6	0.0675	2.3	0.5		600	86.6	87.4275	450	16.76	19.0236	421	9.38	12.6048	93.5556		466	1.33
023-03		14.84	2.2	0.0558	2.1	0.518	3	0.0674	2.2	0.73		444	46.6	47.4385	424	10.54	13.5278	420.4	8.96	12.2872	99.1509		1953	1.44
023-05		14.47	2.4	0.0903	4.6	0.859	5.2	0.0691	2.4	0.46		1430	87.8	92.3407	630	24.4	27.4612	431	10	13.2024	68.4127		498	0.78
023-06		15.12	2.2	0.0701	2.2	0.639	3.1	0.0661	2.2	0.7		930	45.2	48.8774	502	12.32	15.8929	412.7	8.8	12.0652	82.2112		2470	0.76
023-11		14.89	2.2	0.0558	2.8	0.517	3.6	0.0672	2.2	0.63		440	62.2	62.8194	423	12.32	14.945	419.1	8.92	12.2403	99.078		1082	1.78
023-12		14.88	2.2	0.054	2.9	0.501	3.6	0.0672	2.2	0.61		370	65.4	65.8173	412	12.32	14.8216	419.4	8.94	12.259	101.796		925	1.57
023-14		14.82	2.3	0.0617	3.4	0.574	4.1	0.0674	2.3	0.55		660	72.8	73.987	461	15.2	17.7778	420.8	9.38	12.6021	91.2798		763	1.23
023-15		14.49	2.1	0.0581	2.4	0.553	3.2	0.069	2.1	0.67		530	52.6	53.6574	447	11.52	14.582	430.2	8.74	12.2644	96.2416		1616	1.97
023-16-1	Core	13.9	2.4	0.0656	2.5	0.651	3.4	0.0719	2.4	0.69		790	52.4	54.7302	509	13.86	17.1969	448	10.38	13.7123	88.0157		1057	1.63
023-16-2	Rim	14.64	2.3	0.0563	3.8	0.53	4.4	0.0683	2.3	0.52		460	84.2	84.7011	432	15.62	17.8503	426	9.48	12.746	98.6111		457	1.4
023-18		16.26	2.6	0.0708	2.7	0.6	3.8	0.0615	2.6	0.7		950	55.2	58.3784	477	14.28	17.1735	385	9.72	12.4003	80.7128		1127	0.49
023-19		14.05	2.3	0.0721	2.7	0.707	3.5	0.0712	2.3	0.65		990	55	58.4555	543	14.92	18.4539	443	9.86	13.2559	81.5838		1212	0.98
023-20		14.97	2.2	0.0561	3.5	0.516	4.2	0.0668	2.2	0.54		460	77.6	78.1435	423	14.3	16.6151	416.7	8.88	12.1783	98.5106		731	1.57
023-22		14.14	2.2	0.0558	2.1	0.543	3	0.0707	2.2	0.73		442	46.6	47.4311	441	10.88	14.006	440	9.36	12.8472	99.7732		2357	1.61
023-24-1	Core	14.87	2.2	0.0582	2.6	0.539	3.4	0.0672	2.2	0.66		540	57	58.0141	438	12.12	14.9543	419.4	8.94	12.259	95.7534		1298	1.22
023-24-2	Rim	14.81	2.3	0.0562	4.2	0.523	4.8	0.0675	2.3	0.48		460	93.2	93.653	427	16.7	18.7569	421.3	9.38	12.6088	98.6651		406	1.5
023-25		14.96	2.2	0.0587	3.6	0.541	4.2	0.0669	2.2	0.53		550	78.6	79.366	439	15.04	17.4152	417.2	8.88	12.1851	95.0342		642	1.83
023-26		14.81	2.2	0.0559	2.1	0.52	3	0.0675	2.2	0.72		447	46.6	47.4498	425	10.56	13.5559	421.1	8.98	12.3114	99.0824		2421	2.18
023-30-1	Core	5.81	2.3	0.0723	3.3	1.715	4	0.1721	2.3	0.57		990	67	69.8644	1014	25.8	32.8164	1024	21.8	29.911	100.986		237	2.74
023-30-2	Rim	14.83	2.2	0.055	3.9	0.511	4.5	0.0674	2.2	0.49		410	87.2	87.5847	419	15.38	17.5148	420.8	8.96	12.2927	100.43		565	1.71
023-32		14.79	2.2	0.0565	2.3	0.527	3.2	0.0676	2.2	0.69		470	51	51.859	430	11.14	14.0734	421.9	8.98	12.3223	98.1163		1700	1.22
023-34		14.65	2.2	0.05602	1.6	0.527	2.7	0.0682	2.2	0.81		452	35.6	36.7298	430	9.54	12.8441	425.5	9.06	12.43	98.9535		4774	1.35
023-35		14.82	2.3	0.0554	3.9	0.515	4.5	0.0675	2.3	0.51		430	87	87.424	422	15.64	17.772	421	9.38	12.6048	99.763		428	1.38
023-37		14.89	2.2	0.0553	3.8	0.511	4.4	0.0672	2.2	0.51		420	84.8	85.215	419	15.1	17.2695	419	8.92	12.2389	100		550	1.33
023-41-1	Core	4.5	2.3	0.0869	2.5	2.663	3.4	0.2223	2.3	0.68		1358	48.2	55.3255	1318	25	36.3297	1294	27	37.4002	98.1791		216	1.14
023-41-2	Rim	14.52	2.3	0.0564	4.1	0.535	4.8	0.0689	2.3	0.49		470	90.8	91.2853	435	16.64	18.7771	429	9.56	12.8456	98.6207		482	1.41
023-43		14.84	2.4	0.0582	5.6	0.54	6.1	0.0674	2.4	0.4		540	122.6	123.075	439	21.8	23.5017	420	9.76	12.877	95.672		247	1.87
023-45		14.46	2.3	0.0555	3.3	0.529	4	0.0691	2.3	0.57		430	73.6	74.1007	431	14.14	16.5603	431	9.6	12.9021	100		750	1.64
023-46		14.82	2.2	0.056	3	0.521	3.7	0.0675	2.2	0.6		450	66.6	67.2054	426	12.94	15.493	421	8.96	12.2954	98.8263		845	1.12
023-49		14.8	2.4	0.0559	4.4	0.521	5	0.0676	2.4	0.48		450	97.8	98.2132	426	17.42	19.3919	421	9.8	12.9204	98.8263		430	1.59
023-50		14.69	2.3	0.0567	3.6	0.532	4.3	0.0681	2.3	0.54		480	79.6	80.1768	433	15.06	17.3724	425	9.44	12.7029	98.1524		559	1.45
023-51		14.86	2.4	0.0553	2.6	0.513	3.5	0.0673	2.4	0.68		420	58	58.6051	420	12.18	14.7957	420	9.76	12.877	100		1178	1.42
023-53		15.18	2.2	0.0547	3	0.496	3.7	0.0659	2.2	0.6		400	67.2	67.6745	409	12.54	14.9721	411.4	8.76	12.0182	100.587		946	1.25
023-54		13.88	2.4	0.0696	4.8	0.691	5.4	0.0721	2.4	0.44		920	98.8	100.499	533	22.2	24.6267	448	10.4	13.7274	84.0525		308	1.09
023-56		15.45	2.3	0.0713	4.8	0.636	5.3	0.0647	2.3	0.43		960	98	99.8631	500	21	23.2594	404.4	9.02	12.1151	80.88		807	1.8
023-57		14.3	2.2	0.0563	2.1	0.543	3.1	0.0699	2.2	0.72		464	46.6	47.515	440	10.86	13.9778	435.8	9.26	12.7168	99.0455		2194	1.45
023-62		14.77	2.2	0.0562	3.8	0.525	4.4	0.0677	2.2	0.51		460	84.2	84.7011	428	15.34	17.5667	422.4	9	12.3438	98.6916		571	1
023-63		15.01	2.2	0.05455	1.8	0.501	2.8	0.0666	2.2	0.76		393	40.4	41.1575	412	9.64	12.6818	415.8	8.86	12.1514	100.922		2290	1.44
023-64		14.35	2.3	0.0545	2.6	0.523	3.5	0.0697	2.3	0.66		390	58.4	58.9186	427	12.12	14.8265	434	9.66	12.9868	101.639		1357	1.4
023-66		15.61	2.3	0.0656	2.2	0.58	3.2	0.0641	2.3	0.73		794	46.2	48.853	464	11.86	15.0592	400.4	8.92	11.9873	86.2931		3610	1.37
023-68		14.22	2.4	0.0565	3.5	0.547	4.3	0.0703	2.4	0.57		470	77.4	77.9687	443	15.24	17.6283	438	10.16	13.415	98.8713		675	1.16
023-71		14.55	2.3	0.0556	3.9	0.527	4.5	0.0687	2.3	0.5		440	86.8	87.2449	430	15.86	18.0416	428	9.54	12.8174	99.5349		423	0.9
023-75		15.26	2.2	0.0555	2.5	0.501	3.3	0.0655	2.2	0.66		430	55.8	56.4588	412	11.28	13.9691	409.1	8.72	11.9576	99.2961		1307	1.73
023-77-1	Core	6.03	2.2	0.0737	2.4	1.685	3.2	0.1658	2.2	0.67		1033	48.6	52.809	1003	20.8	28.8971	989	20.2	28.2717	98.6042		532	2.02
023-77-2	Rim	16.5	2.4	0.0639	4.4	0.534	5	0.0606	2.4	0.48		740	93.2	94.3678	435	17.7	19.7226	379.3	8.84	11.6487	87.1954		409	1.31
023-80		15.13	2.3	0.0562	3.7	0.512	4.4	0.0661	2.3	0.52		460	82	82.5145	420	14.98	17.1744	412.6	9.2	12.3586	98.2381		676	1.5
023-81		14.61	2.5	0.0618	5.1	0.583	5.7	0.0684	2.5	0.44		660	109.2	109.995	466	21.2	23.1582	427	10.32	13.3953	91.6309		272	0.96
023-82		15.12	2.2	0.0561	3.1	0.512	3.8	0.0661	2.2	0.58		460	68.8	69.4124	420	13.06	15.5282	412.9	8.8	12.0679	98.3095		906	1.58
023-84		14.64	2.2	0.0575	2.8	0.541	3.6	0.0683	2.2	0.62		510	61.6	62.4388	439	12.7	15.4395	425.9	9.06	12.4354	97.0159		716	1.26
023-85		14.95	2.2	0.0573	3.2	0.528	3.9	0.0669	2.2	0.57		500	70.4	71.1067	431	13.62	16.1186	417.5	8.9	12.2038	96.8677		631	1.32
023-88		14.94	2.2	0.0552	2.9	0.509	3.6	0.0669	2.2	0.6		420	64.8	65.3422	418	12.48	15.0213	417.5	8.9	12.2038	99.8804		1015	1.3
023-89		14.72	2.2	0.0565	2.1	0.529	3	0.0679	2.2	0.73		471	46.4	47.3466	431	10.68	13.7247	423.8	9.02	12.3775	98.3295		2193	1.04
023-93		14.87	2.3	0.0588	3.9	0.545	4.5	0.0673	2.3	0.51		560	85	85.7347	441	16.22	18.463	419.6	9.34	12.5563	95.1474		456	1.43
023-98		14.32	2.2	0.0605	2.2	0.583	3.1	0.0698	2.2	0.71		622	47.4	49.0052	466	11.62	14.8959	435	9.26	12.7058	93.3476		1711	1.62
023-99		14.85	2.2	0.0547	3.2	0.507	3.9	0.0673	2.2	0.56		400	71.8	72.2443	417	13.28	15.6816	420	8.94	12.2672	100.719		945	1.11
023-103		15.07	2.2	0.0633	3.2	0.579	3.9	0.0663	2.2	0.57		720	68	69.508	464	14.46	17.1817	414.1	8.82	12.0989	89.2457		639	1.67
023-104		14.86	2.2	0.0561	2.2	0.52	3.1	0.0673	2.2	0.71		455	48.8	49.6412	425	10.82	13.7594	419.9	8.94	12.2658	98.8		2109	1.68
023-106		15.13	2.2	0.0561	3.2	0.511	3.9	0.0661	2.2	0.57		460	71	71.5936	419	13.34	15.7537	412.5	8.8	12.0624	98.4487		659	1.66
023-108		15	2.4	0.0544	5.1	0.5	5.7	0.0667	2.4	0.43		390	114.6	114.865	412	19.08	20.7833	416	9.66	12.749	100.971		281	1.08
023-109		15	2.3	0.054	4.5	0.496	5.1	0.0667	2.3	0.45		370	101.4	101.67	409	17.02	18.8837	416.2	9.26	12.4514	101.76		405	1.51
023-110		14.07	2.4	0.0559	2.4	0.547	3.4	0.0711	2.4	0.7		450	53.4	54.1531	443	12.2	15.0778	443	10.26	13.5561	100		1281	1.24
a207Pb/235U calculated assuming a natural 238U/235U ratio of 137.818
bRho value is calculated following the method of Paton et al. (2010)
dAge calculations are based on the decay constants of Jaffey et al. (1971)

## Sheet: 026-zrc
DA18-026		U-Pb ratios										U-Pb dates
Analysis	Core/Rim	238U/206Pb	±2SE (%)	207Pb/206Pb	±2SE (%)	207Pb/235Ua	±2SE (%)	206Pb/238U	±2SE (%)	rhob		207Pb/206Pb	±2SE	±2SE (sys)	207Pb/235U	±2SE	±2SE (sys)	206Pb/238Ud	±2SE	±2SE (sys)	Concordance		U (ppm)	U/Th
026-01		14.56	2.2	0.0541	2.6	0.512	3.4	0.0687	2.2	0.65		380	58.6	59.0908	420	11.72	14.4194	428.3	9.12	12.512	101.976		697	2.18
026-02		14.79	2.3	0.0647	2.3	0.602	3.2	0.0676	2.3	0.69		762	48.4	50.7427	479	12.42	15.6854	421.7	9.38	12.6141	88.0376		958	2.12
026-03		14.62	2.3	0.0547	3.8	0.516	4.5	0.0684	2.3	0.52		400	85.2	85.5748	422	15.34	17.5085	426	9.5	12.7609	100.948		361	3.74
026-04		15.29	2.3	0.0539	3.2	0.486	3.9	0.0654	2.3	0.58		370	72.2	72.5782	402	13.08	15.3534	408.5	9.1	12.2294	101.617		485	3.42
026-05-1	Core	14.71	2.3	0.0549	3	0.515	3.8	0.068	2.3	0.6		410	67.2	67.6984	422	13.04	15.533	424	9.44	12.6895	100.474		532	3.76
026-05-2	Rim	15.08	2.3	0.0548	3.5	0.501	4.2	0.0663	2.3	0.54		400	78.4	78.8071	412	14.2	16.4176	413.9	9.22	12.3909	100.461		394	3.31
026-06		14.44	2.4	0.0629	2.7	0.6	3.6	0.0692	2.4	0.67		700	57.4	59.0827	477	13.76	16.7436	432	10.02	13.2306	90.566		839	2.6
026-07		15.02	2.3	0.0547	2.9	0.502	3.7	0.0666	2.3	0.61		400	65	65.4905	413	12.56	15.0327	415.6	9.26	12.4433	100.63		641	3.23
026-08		14.74	2.2	0.0597	3	0.559	3.7	0.0679	2.2	0.59		590	65	66.0624	451	13.54	16.2694	423.2	9.02	12.3693	93.8359		536	3.69
026-09		14.97	2.3	0.0549	3	0.505	3.7	0.0668	2.3	0.6		410	67.2	67.6984	415	12.88	15.3227	417	9.28	12.4769	100.482		616	3.89
026-10		15.22	2.2	0.0563	2.2	0.51	3.1	0.0657	2.2	0.71		462	48.8	49.6671	418	10.66	13.5471	410.2	8.74	11.9872	98.134		1045	2.11
026-101		15.62	2.3	0.0557	3.2	0.492	3.9	0.064	2.3	0.57		440	71.2	71.7418	406	13.18	15.4805	400	8.92	11.9819	98.5222		524	4.85
026-104		14.9	2.2	0.0549	3.2	0.508	3.9	0.0671	2.2	0.57		410	71.6	72.068	417	13.28	15.6816	418.9	8.92	12.2375	100.456		511	3.6
026-105		15.55	2.2	0.0616	2.2	0.546	3.1	0.0643	2.2	0.7		658	47.2	49.0003	442	11.16	14.237	401.9	8.56	11.7424	90.9276		941	3.45
026-107		15.53	2.2	0.0563	3.7	0.5	4.4	0.0644	2.2	0.51		460	82	82.5145	411	14.56	16.7201	402.3	8.58	11.7624	97.8832		426	3.09
026-109-1	Core	15.64	2.3	0.0559	2.4	0.493	3.3	0.064	2.3	0.68		450	53.4	54.1531	407	11.14	13.7971	399.7	8.92	11.9779	98.2064		1047	3.27
026-109-2	Rim	15.16	2.3	0.0679	4.6	0.617	5.1	0.0659	2.3	0.45		860	95.4	96.9381	488	19.94	22.2005	411.7	9.18	12.3317	84.3648		482	3.03
026-11-1	Core	15.1	2.2	0.056	3.3	0.511	4	0.0662	2.2	0.56		450	73.2	73.7512	419	13.62	15.9915	413.3	8.8	12.0734	98.6396		552	4.68
026-11-2	Rim	15.47	2.2	0.058	3	0.516	3.7	0.0646	2.2	0.59		530	65.8	66.6483	423	12.86	15.3932	403.7	8.62	11.8108	95.4374		472	3.5
026-13		15.6	2.4	0.0592	4.5	0.523	5.1	0.0641	2.4	0.47		570	97.8	98.4622	427	17.78	19.7246	400.5	9.32	12.2891	93.7939		219	3.66
026-15		14.71	2.3	0.0594	2.9	0.556	3.7	0.068	2.3	0.62		580	63	64.059	449	13.44	16.164	424	9.44	12.6895	94.4321		733	1.34
026-17-1	Core	14.06	2.3	0.0561	2.2	0.55	3.2	0.0711	2.3	0.72		455	48.8	49.6412	445	11.46	14.5101	443	9.84	13.241	99.5506		1092	2.03
026-17-2	Rim	14.45	2.3	0.0665	3.3	0.634	4	0.0692	2.3	0.57		820	69	70.9222	499	15.86	18.7387	431	9.6	12.9021	86.3727		369	7.96
026-21		15.2	2.2	0.0591	2.6	0.536	3.4	0.0658	2.2	0.66		570	56.6	57.7366	436	12.06	14.8823	410.8	8.76	12.01	94.2202		802	3.68
026-22		15.87	2.3	0.0639	2.2	0.555	3.2	0.063	2.3	0.72		739	46.6	48.8877	448	11.54	14.61	393.9	8.78	11.7962	87.9241		1271	3.2
026-23-1	Core	14.62	2.3	0.0558	2.7	0.526	3.6	0.0684	2.3	0.65		440	60	60.6419	429	12.42	15.0955	426	9.5	12.7609	99.3007		728	2.9
026-23-2	Rim	15.07	2.2	0.058	2.9	0.531	3.6	0.0664	2.2	0.61		530	63.6	64.4773	432	12.8	15.4431	414.2	8.82	12.1003	95.8796		749	3.36
026-24		14.76	2.3	0.0544	2.8	0.508	3.6	0.0678	2.3	0.63		390	62.8	63.2825	417	12.4	14.9437	422.6	9.4	12.6411	101.343		901	3.49
026-25		14.45	2.3	0.0623	2.9	0.594	3.7	0.0692	2.3	0.62		680	62	63.4741	474	14	16.9077	431	9.6	12.9021	90.9283		678	2.7
026-26		15.34	2.2	0.0545	2.7	0.49	3.5	0.0652	2.2	0.62		390	60.6	61.0999	405	11.62	14.1645	407.1	8.68	11.901	100.519		937	2.95
026-28		15.2	2.4	0.072	10	0.652	10	0.0658	2.4	0.23		980	204	204.939	510	41.2	42.4438	410.7	9.56	12.6041	80.5294		799	2.19
026-31		15.91	2.2	0.065	4.4	0.563	4.9	0.0628	2.2	0.45		770	92.6	93.8718	453	18	20.1515	392.9	8.38	11.4879	86.7329		621	3.18
026-32		15.1	2.2	0.0564	2.4	0.515	3.2	0.0662	2.2	0.68		470	53.2	54.0241	421	11.24	14.044	413.4	8.8	12.0748	98.1948		1172	1.56
026-36-1	Core	14.79	2.3	0.056	3.1	0.522	3.9	0.0676	2.3	0.6		450	68.8	69.3862	426	13.44	15.913	422	9.38	12.6182	99.061		665	3.47
026-36-2	Rim	15.24	2.2	0.0559	2.9	0.505	3.6	0.0656	2.2	0.6		450	64.4	65.0258	415	12.42	14.9381	409.8	8.74	11.9817	98.747		624	2.89
026-41		15.04	2.4	0.0548	5.5	0.503	6	0.0665	2.4	0.4		410	123.2	123.473	414	20.4	22.0163	415	9.64	12.7208	100.242		164	4.7
026-42		14.88	2.3	0.0542	3.2	0.502	3.9	0.0672	2.3	0.58		380	72	72.4	413	13.38	15.7242	419.3	9.34	12.5523	101.525		506	3.56
026-43		15.05	2.2	0.0549	2.9	0.502	3.7	0.0664	2.2	0.61		410	64.8	65.3168	413	12.36	14.866	414.6	8.84	12.1203	100.387		518	2.34
026-46-1	Core	14.35	2.6	0.0511	6.5	0.491	7	0.0697	2.6	0.37		240	149.8	149.877	405	23.4	24.7623	434	10.92	13.9495	107.16		108	1.86
026-46-2	Rim	15.72	2.3	0.0609	4	0.534	4.6	0.0636	2.3	0.49		640	86.2	87.1452	435	16.3	18.4765	397.6	8.86	11.9052	91.4023		308	3.33
026-52		14.41	2.5	0.0557	2.4	0.533	3.5	0.0694	2.5	0.72		440	53.4	54.1202	434	12.24	15.0053	432	10.46	13.5669	99.5392		1042	1.29
026-53		15.1	2.2	0.0544	2.5	0.496	3.4	0.0662	2.2	0.65		390	56.2	56.7387	409	11.22	13.8853	413.3	8.8	12.0734	101.051		802	3.74
026-54		16.04	2.2	0.0733	2.9	0.63	3.6	0.0624	2.2	0.6		1020	58.8	62.2383	496	14.28	17.3875	390	8.32	11.4045	78.629		2171	1.41
026-55		16.67	2.4	0.1058	5.3	0.875	5.8	0.06	2.4	0.41		1730	97.2	103.175	638	27.6	30.4069	375.5	8.76	11.5385	58.8558		493	2.23
026-57		15.21	2.2	0.0566	2.7	0.513	3.5	0.0658	2.2	0.63		480	59.8	60.5657	421	11.98	14.643	410.5	8.74	11.9913	97.5059		616	4.05
026-59		15.1	2.2	0.0567	3.3	0.517	4	0.0662	2.2	0.56		480	73	73.6285	423	13.74	16.1356	413.5	8.8	12.0761	97.7541		498	4.07
026-60		15.34	2.2	0.0558	3.7	0.501	4.3	0.0652	2.2	0.52		440	82.2	82.6697	412	14.6	16.7648	407	8.68	11.8997	98.7864		380	2.93
026-63		15.09	2.2	0.0584	2.9	0.533	3.6	0.0663	2.2	0.61		540	63.4	64.3133	434	12.86	15.5152	413.6	8.82	12.0921	95.2995		576	7.68
026-64		15.23	2.2	0.0553	2.3	0.5	3.1	0.0656	2.2	0.7		420	51.4	52.0819	412	10.78	13.5686	409.9	8.74	11.9831	99.4903		978	1.05
026-66-1	Core	14.49	2.3	0.0556	2.9	0.529	3.7	0.069	2.3	0.63		430	64.6	65.1699	431	13	15.5982	430	9.58	12.8739	99.768		635	3.79
026-66-2	Rim	14.09	2.2	0.0559	2.5	0.547	3.3	0.071	2.2	0.67		450	55.6	56.3237	443	11.96	14.8843	442	9.4	12.9037	99.7743		833	3.05
026-69		15.41	2.2	0.0561	2.6	0.502	3.4	0.0649	2.2	0.65		460	57.6	58.3301	413	11.56	14.2078	405.2	8.64	11.8459	98.1114		1144	3.9
026-72		14.64	2.3	0.0572	3.2	0.539	3.9	0.0683	2.3	0.58		500	70.4	71.1067	437	14	16.5042	425.9	9.48	12.7447	97.46		447	2.93
026-73		15.36	2.2	0.0554	3	0.497	3.7	0.0651	2.2	0.6		430	66.8	67.3513	409	12.54	14.9721	406.5	8.66	11.8782	99.3888		756	4.15
026-76		15.01	2.3	0.0641	3.3	0.588	4	0.0666	2.3	0.57		740	69.8	71.3518	470	15.14	17.8208	415.7	9.26	12.4447	88.4468		508	9.62
026-79		15.44	2.2	0.0577	3.1	0.515	3.8	0.0648	2.2	0.58		520	68	68.7907	422	13.12	15.6003	404.7	8.62	11.8244	95.9005		659	3
026-80		15.59	2.2	0.0563	3.2	0.498	3.9	0.0641	2.2	0.57		460	71	71.5936	410	13.1	15.4548	400.8	8.54	11.7127	97.7561		519	2.91
026-82		14.81	2.2	0.0567	1.8	0.527	2.8	0.0675	2.2	0.77		478	39.8	40.9321	430	9.96	13.1591	421.2	8.98	12.3128	97.9535		2153	3.39
026-83		15.05	2.3	0.056	2.8	0.513	3.6	0.0664	2.3	0.64		450	62.2	62.8478	421	12.48	15.0548	414.7	9.24	12.4164	98.5036		535	3.46
026-90		15.25	2.3	0.0639	2.9	0.577	3.7	0.0656	2.3	0.62		740	61.4	63.1585	463	13.76	16.5857	409.4	9.12	12.2563	88.4233		547	1.93
026-93-1	Core	14.78	2.4	0.0562	3.2	0.524	4	0.0677	2.4	0.59		460	71	71.5936	428	13.96	16.3754	422	9.8	12.9334	98.5981		509	3.79
026-93-2	Rim	15.81	2.2	0.0564	2.7	0.491	3.5	0.0633	2.2	0.62		470	59.8	60.5343	406	11.66	14.2088	395.4	8.44	11.5659	97.3892		605	3.15
026-97		15.33	2.3	0.057	3.8	0.513	4.4	0.0652	2.3	0.51		490	83.8	84.3711	420	15.28	17.4367	407.4	9.08	12.1998	97		328	3.03
026-98		15.26	2.3	0.0577	2.8	0.521	3.6	0.0655	2.3	0.63		520	61.4	62.2746	426	12.6	15.2102	409.3	9.12	12.255	96.0798		583	4.39
026-99		15.89	2.2	0.0546	3.3	0.474	4	0.063	2.2	0.56		400	74	74.4312	394	12.94	15.1505	393.5	8.4	11.5107	99.8731		531	1.99
a207Pb/235U calculated assuming a natural 238U/235U ratio of 137.818
bRho value is calculated following the method of Paton et al. (2010)
dAge calculations are based on the decay constants of Jaffey et al. (1971)

## Sheet: 029-zrc
DA18-029		U-Pb ratios										U-Pb dates
Analysis	Core/Rim	238U/206Pb	±2SE (%)	207Pb/206Pb	±2SE (%)	207Pb/235Ua	±2SE (%)	206Pb/238U	±2SE (%)	rhob		207Pb/206Pb	±2SE	±2SE (sys)	207Pb/235U	±2SE	±2SE (sys)	206Pb/238Ud	±2SE	±2SE (sys)	Concordance		U (ppm)	U/Th
029-04		13.77	2.6	0.0559	1.9	0.56	3.2	0.0726	2.6	0.8		449	42.2	43.1449	451	11.74	14.805	452	11.34	14.5023	100.222		3831	9.23
029-06		14.58	2.2	0.0659	2.9	0.622	3.7	0.0686	2.2	0.61		800	60.8	62.87	491	14.18	17.2483	427.5	9.1	12.4865	87.0672		1161	3.42
029-08-1	Core	5.51	2.4	0.0791	1.9	1.98	3	0.1817	2.4	0.78		1173	37.6	44.3185	1109	20.6	30.2707	1076	23.8	32.0866	97.0243		519	9.06
029-08-2	Rim	14.83	2.2	0.05533	1.7	0.514	2.8	0.0674	2.2	0.8		424	38	38.9347	421	9.58	12.7543	420.7	8.96	12.2913	99.9287		2678	5.89
029-09		15.25	2.3	0.0589	1.8	0.533	2.9	0.0656	2.3	0.79		564	39.2	40.7907	433	10.3	13.4568	409.3	9.12	12.255	94.5266		2881	6.22
029-10-1	Core	4.32	3	0.1078	1.6	3.44	3.4	0.2315	3	0.89		1761	29.2	45.7503	1510	26.8	40.3767	1342	36.4	45.2255	88.8742		495	3.68
029-10-2	Rim	29.52	2.4	0.0697	2.7	0.325	3.6	0.03388	2.4	0.67		920	55.6	58.5655	286	9	10.6639	214.8	5.06	6.63771	75.1049		16169	9.19
029-11-1	Core	6.78	2.2	0.0782	2	1.59	3	0.1475	2.2	0.75		1151	39.8	45.9778	966	18.54	26.7767	887	18.22	25.4298	91.8219		674	0.54
029-11-2	Rim	15.07	4.8	0.0643	1.9	0.588	5.2	0.0663	4.8	0.93		750	40.2	42.9073	469	19.4	21.5487	414	19.26	20.9644	88.2729		5217	7.87
029-12		9.74	3.8	0.0824	2.3	1.166	4.5	0.1027	3.8	0.86		1254	45	51.517	785	24.2	28.8467	630	22.8	26.05	80.2548		1527	5.38
029-14-1	Core	6.41	3.5	0.0961	1.8	2.066	3.9	0.156	3.5	0.89		1548	33.8	45.8362	1138	27	35.3131	935	30.4	35.691	82.1617		492	1.84
029-14-2	Rim	15.83	4	0.0577	1.8	0.503	4.4	0.0632	4	0.91		518	39.6	40.9327	413	14.9	17.0364	395	15.32	17.2369	95.6416		3951	5.63
029-15		13.53	2.5	0.0742	1.9	0.756	3.2	0.0739	2.5	0.8		1045	38.4	43.7192	571	13.72	17.8509	460	11.1	14.417	80.5604		1358	61.61
029-16-1	Core	5.05	2.4	0.0787	3.2	2.147	4	0.198	2.4	0.61		1160	63.4	67.5115	1164	27.8	36.2601	1165	25.6	34.6157	100.086		90	2.68
029-16-2	Rim	16.81	2.5	0.1032	2.7	0.846	3.7	0.0595	2.5	0.68		1680	49.8	60.075	623	17.12	21.1742	372.4	9.04	11.713	59.7753		1550	5.66
029-17-1	Core	5.71	2.2	0.0761	1.9	1.836	2.9	0.1752	2.2	0.76		1096	38	43.869	1059	19.12	28.5336	1041	21.2	29.7138	98.3003		395	3.4
029-17-2	Rim	56.7	2.3	0.0712	2.5	0.173	3.4	0.01764	2.3	0.68		960	51	54.4944	162.1	5.08	6.02636	112.7	2.56	3.41088	69.525		36465	26.71
029-18		8.42	2.7	0.0837	1.9	1.371	3.2	0.1188	2.7	0.82		1285	37	45.0499	876	19.38	26.1254	724	18.48	23.4772	82.6484		837	3.86
029-19		15.44	2.2	0.0597	2.4	0.533	3.3	0.0648	2.2	0.67		590	52	53.322	434	11.5	14.4081	404.7	8.62	11.8244	93.2488		674	4.05
029-20-1	Core	4.47	2.2	0.0842	2.2	2.597	3.2	0.2239	2.2	0.71		1295	42.8	50.0265	1300	22.8	34.5809	1303	26	36.812	100.231		255	2.87
029-20-2	Rim	14.48	2.2	0.05888	1.5	0.56	2.6	0.069	2.2	0.83		562	32.6	34.4833	452	9.72	13.274	430.4	9.16	12.5699	95.2212		2996	6.4
029-21		14.63	5.8	0.05554	1.7	0.523	6	0.0683	5.8	0.96		433	37.8	38.7793	427	21	22.6701	426	24	25.4674	99.7658		5400	0.26
029-22-1	Core	6.03	2.2	0.0722	1.5	1.649	2.7	0.1657	2.2	0.82		990	30.6	36.4472	989	16.84	25.9776	989	20.2	28.2717	100		1186	4.43
029-22-2	Rim	32.61	2.4	0.05475	1.2	0.2314	2.7	0.03066	2.4	0.89		401	26.8	27.9743	211.3	5.12	6.63879	194.7	4.6	6.02688	92.1439		24056	23.09
029-25		14.82	2.2	0.0561	2.4	0.522	3.2	0.0675	2.2	0.68		460	53.2	53.9896	426	11.34	14.184	421	8.96	12.2954	98.8263		1009	1.43
029-26-1	Core	6.08	2.7	0.0763	4.1	1.731	4.9	0.1646	2.7	0.55		1100	82	84.8999	1020	31.6	37.6128	982	24.6	31.4784	96.2745		88	2.32
029-26-2	Rim	17.7	6.9	0.0611	1.9	0.475	7.1	0.0565	6.9	0.96		640	40.8	42.7607	395	23.4	24.6976	354	23.8	24.8308	89.6203		6315	7
029-28-1	Core	2.966	2.3	0.1232	1.5	5.72	2.7	0.3371	2.3	0.83		2003	26.6	48.087	1940	23.8	45.5179	1873	37.4	52.934	96.5464		276	4.7
029-28-2	Rim	36.4	3	0.0654	1.7	0.2473	3.4	0.02744	3	0.87		787	35.6	38.9244	224.4	6.94	8.26473	174.5	5.18	6.246	77.7629		16139	18.75
029-29		9.14	5.5	0.0654	5.7	0.987	7.9	0.1094	5.5	0.7		790	119.6	120.639	697	40	42.3595	669	35	37.4703	95.9828		100	1.14
029-31-1	Core	9.18	3	0.0667	1.6	1.001	3.4	0.1089	3	0.88		826	33.4	37.2622	704	17.28	22.29	667	19	23.2154	94.7443		1722	7.49
029-31-2	Rim	28.03	2.6	0.05671	1.4	0.2788	2.9	0.03568	2.6	0.88		479	31	32.4465	249.7	6.54	8.22871	226	5.78	7.33749	90.5086		14238	18.13
029-33		14.78	2.1	0.0785	3.2	0.732	3.8	0.0677	2.1	0.56		1160	63.4	67.5115	558	16.42	19.8535	422.1	8.58	12.0368	75.6452		1951	2.8
029-35-1	Core	12.76	2.5	0.0868	2.6	0.938	3.6	0.0784	2.5	0.69		1360	50.2	57.0954	672	17.72	22.2403	487	11.72	15.239	72.4702		1141	6.05
029-35-2	Rim	15.36	2.2	0.0646	2.6	0.58	3.4	0.0651	2.2	0.65		760	54.8	56.869	465	12.68	15.7249	406.7	8.66	11.881	87.4624		1007	3.31
029-35-3	Rim	50.1	2.7	0.06064	1.6	0.1668	3.1	0.01996	2.7	0.86		626	34.6	36.7955	156.7	4.56	5.53313	127.4	3.4	4.2488	81.3019		44135	30.53
029-37		31.8	2.8	0.05631	1.3	0.244	3.1	0.03145	2.8	0.91		463	28.8	30.2521	221.7	6.14	7.57364	199.6	5.5	6.79603	90.0316		20480	17.86
029-38		15.79	2.2	0.0538	2.4	0.47	3.2	0.0633	2.2	0.67		360	54.2	54.6761	391	10.56	13.1402	395.8	8.44	11.5714	101.228		1270	0.71
029-39-1	Core	3.41	3.6	0.1719	1.3	6.95	3.8	0.293	3.6	0.94		2575	21.8	55.924	2100	34	54.037	1658	52.6	62.1799	78.9524		711	4.63
029-39-2	Rim	37.78	2.4	0.05445	1.1	0.1986	2.6	0.02647	2.4	0.9		389	24.6	25.8009	184	4.44	5.7668	168.4	3.98	5.21381	91.5217		47265	23.99
029-40-1	Core	5.76	2.2	0.0726	1.9	1.737	2.9	0.1736	2.2	0.75		1002	38.6	43.4921	1022	18.74	27.7305	1032	21	29.445	100.978		482	3
029-40-2	Rim	15.69	4.6	0.05465	1.6	0.48	4.9	0.0638	4.6	0.94		397	35.8	36.6699	398	16.04	17.9065	398	17.76	19.4623	100		4716	9.28
029-43		6.57	2.2	0.0761	1.8	1.595	2.9	0.1521	2.2	0.76		1096	36	42.1484	968	17.74	26.2587	913	18.74	26.1652	94.3182		544	12.35
a207Pb/235U calculated assuming a natural 238U/235U ratio of 137.818
bRho value is calculated following the method of Paton et al. (2010)
dAge calculations are based on the decay constants of Jaffey et al. (1971)

[truncated: 18 more sheets: 032-zrc, 044-zrc, 047-zrc, 048-zrc, 051-zrc, 056-zrc, 057-zrc, 014-ttn, 015-ttn, 023-ttn, 026-ttn, 047-ttn, 051-ttn, 056-ttn, 057-ttn, 065-ttn, 082-ttn, 088-ttn]
